## Review Article

# Epithelial–mesenchymal transition and its transcription factors

Pallabi Debnath\*, Rohit Singh Huirem\*, Paloma Dutta† and  Santanu Palchoudhuri

Amity Institute of Biotechnology, Amity University Kolkata, West Bengal, India

**Correspondence:** Santanu Palchoudhuri (spalchoudhuri@kol.amity.edu)

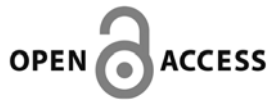

Epithelial–mesenchymal transition or EMT is an extremely dynamic process involved in conversion of epithelial cells into mesenchymal cells, stimulated by an ensemble of signaling pathways, leading to change in cellular morphology, suppression of epithelial characters and acquisition of properties such as enhanced cell motility and invasiveness, reduced cell death by apoptosis, resistance to chemotherapeutic drugs etc. Significantly, EMT has been found to play a crucial role during embryonic development, tissue fibrosis and wound healing, as well as during cancer metastasis. Over the years, work from various laboratories have identified a rather large number of transcription factors (TFs) including the master regulators of EMT, with the ability to regulate the EMT process directly. In this review, we put together these EMT TFs and discussed their role in the process. We have also tried to focus on their mechanism of action, their interdependency, and the large regulatory network they form. Subsequently, it has become clear that the composition and structure of the transcriptional regulatory network behind EMT probably varies based upon various physiological and pathological contexts, or even in a cell/tissue type-dependent manner.

## Introduction

Epithelial–mesenchymal transition or EMT is a biological process by which cuboidal, tightly packed, and non-motile epithelial cells adopt a loosely organized mesenchymal or fibroblast-like phenotype with properties such as reduced intercellular adhesion, loss of apical–basal polarity, gain of motility and invasive ability, increased resistance to apoptosis, and enhanced ability of ECM production (Figure 1). EMT (type I) was originally identified as a critical program during early embryonic morphogenesis and was found to be involved in various developmental stages such as gastrulation, neural crest formation, and heart morphogenesis. EMT (type II) was found to be induced in response to inflammation, for example during wound healing, tissue regeneration, and fibrosis. EMT (type III) program was shown to be activated during metastasis, which is the primary cause of mortality in cancer patients [1–5]. Significantly, EMT has been found to induce other properties such as, acquisition of stem cell-like phenotype, resistance to chemotherapy, immune-evasion etc in cancer cells, thus making these cells difficult to eradicate. Complexity of the EMT mechanism is also exemplified by the fact that cells undergoing EMT have sometimes been observed to attain a hybrid epithelial–mesenchymal phenotype, expressing both epithelial and mesenchymal markers.

## EMT in development

The EMT (type I) was originally identified as a critical program during early embryonic morphogenesis and was found to be involved at various early developmental stages [4,6,7]. Indeed, multiple rounds of EMT and its reverse process Mesenchymal–Epithelial Transition or MET, has been

\*These authors contributed equally to this work.

†Present address: Tata Medical Centre, Kolkata, West Bengal, India

Received: 24 July 2021

Revised: 26 October 2021

Accepted: 28 October 2021

Accepted Manuscript Online:  
16 November 2021

Version of Record published:  
23 December 2021

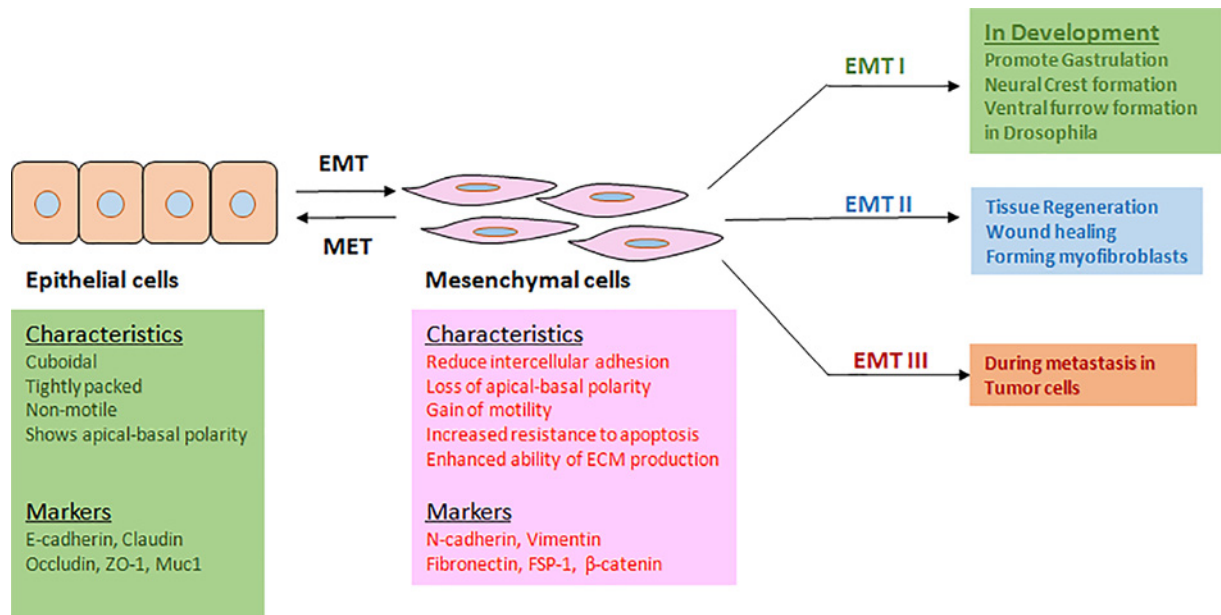

**Figure 1. EMT: characteristics, markers, and contexts**

EMT is activated in different physiological and pathological contexts, thereby facilitating cellular movement. It is associated with both morphological and characteristics' changes.

shown to be essential for the development of the complex three-dimensional structure of the internal organs. Accordingly, these EMTs are referred to as primary, secondary, and tertiary EMT. The primary EMTs include those involved during mammalian implantation, metazoan gastrulation, and neural crest formation in vertebrates. Gastrulation is a process through which the cells in the bilaminar embryonic disc of blastula/blastocyst move and rearrange to form the gastrula with three germ layers namely endoderm, mesoderm, and ectoderm. EMT is one of the mechanisms activated during gastrulation through which cells get separated from the epiblast layer and migrate into a specific region within embryo such as the primitive streak in amniotes, the vegetal pole in sea urchin or the ventral furrow in *Drosophila*, and thereby form the three germ layers at a defined location within the embryo.

Following gastrulation, the cuboidal epithelial cells in the ectoderm above the mesoderm change into columnar epithelial cells which form the neural plate and become distinguishable from the pre-epidermal cells surrounding them. The changes in cell shape and adhesion properties lead to bending of the neural plate leading to the formation of neural tube, which further develops into the central nervous system. During this process, neural crest is formed between epidermal layer and the neural tube. The neural crest cells then undergo EMT within the dorsal neural epithelium and migrate to their target sites, where they differentiate into different derivatives such as most components of the peripheral nervous system including neurons and glial cells, melanocytes, endocrine cells, and craniofacial structures [8–11].

Notably, these primary EMT events are followed by a set of differentiation events, that generate different types of cells, which undergo MET and acquire transient epithelial structures such as notochord, somites, precursors of the urogenital system, and the somatopleure and splanchnopleure. Except for notochord, all these secondary epithelia undergo a secondary EMT in presence of external signals from their microenvironment and generate mesenchymal cells with more restricted differentiation potential. Tertiary EMT can be observed during cushion mesenchyme formation from the atrioventricular canal or outflow tract in the heart. Together, all these sequential EMT and MET events lead to the development of a fully functional embryo.

## EMT in pathogenesis

Interestingly, EMT (type II) was also found to be induced in response to inflammation, for example during wound healing, tissue regeneration, and fibrosis [1,4,6,12]. EMT-like event has been found to occur during wound healing, where keratinocytes at the border of the wound undergo partial EMT and acquire a metastable state. This allows the keratinocytes to move while maintaining loose contact with the surroundings. In case of tissue fibrosis, the myofibroblasts accumulate and secrete a large amount of collagen which is deposited as fibers. This compromises the organ

function and ultimately leads to its failure. It was found that a significant portion of the myofibroblasts is generated through the conversion of epithelial cells by the EMT process. Infact, the lens epithelium, endothelium, hepatocytes, as well as cardiomyocytes were all shown to undergo EMT and facilitate the tissue fibrosis process.

EMT (type III) program has further been found to be activated during metastasis, which is the primary cause of mortality in cancer patients [2,6,7]. A small population of cancer cells in the primary tumor activates the EMT program to gain motility and invasiveness by which they disseminate from their site of origin, released into the circulation, and move to a distant site. Small aggregates of tumor cells extending or detaching from the bulk tumor and entering the adjacent stroma have been detected at the invasive fronts of human tumors such as colon carcinoma, breast carcinoma, papillary thyroid carcinoma, cervical carcinoma etc. This was found to be concomitant with reduced expression of E-cadherin, selective loss of basement membrane and/or increased expression of Vimentin etc. Interestingly enough, it was found that often cancer cells undergoing EMT do not show a complete conversion, rather they pass through EMT at different extents. Consequently, some of these cells may express both epithelial and mesenchymal markers, thereby exhibiting a hybrid epithelial–mesenchymal state. Nonetheless, some of these cells might also show complete conversion exhibiting only mesenchymal phenotype and respective markers. One reason for this apparent incomplete conversion could be the difficulty to distinguish fully converted mesenchymal cells originated from epithelial cancer cells via EMT from stromal cells or tumor-associated fibroblasts. Significantly, EMT, especially partial EMT has been found to induce stem cell-like properties such as self-renewal ability and enhanced differentiation potential in cancer cells. This provides the cancer cells a tremendous advantage to survive and sustain inside the host.

## Master regulators of EMT

The EMT process under different contexts were found to be activated by several signaling molecules. For example, EMT associated with gastrulation is activated by the canonical Wnt signaling pathway, the TGF $\beta$  superfamily proteins Nodal and Vg1 and growth factors such as FGF, EGF etc. During neural crest formation, EMT is induced by signaling molecules such as Wnt, BMP, FGF, Notch etc. Type II EMT is induced by factors such as VEGF and TGF $\beta$ , whereas type III EMT, or EMT associated with metastasis is induced by a large set of signaling molecules such as Wnt, TGF $\beta$ , BMP, FGF, EGF, HGF, PDGF, VEGF, Estrogen, SCF etc. Collectively, these molecules stimulate various signaling pathways, thereby activating a small set of transcription factors (TFs) or master regulators of EMT. These include Snail Family proteins Snail1 (Snail), Snail2 (Slug), Zinc finger E-box binding (Zeb) homeobox family proteins Zeb1 and Zeb2, and TWIST family proteins Twist1 and Twist2 (Figure 2). Together, these TFs act to suppress expression of epithelial markers such as E-cadherin, Claudin, Occludin, Mucin-1, PTEN, RKIP etc. as well as activate mesenchymal markers such as N-cadherin, Vimentin, Vitronectin, Matrix Metalloproteases etc. (Figure 3 and Table 1). E-cadherin (CDH1), a calcium-dependent cell adhesion protein and part of the cell–cell adheren junction, is one of the most studied genes regulated by several EMT TFs. Down-regulation of CDH1 by the EMT TFs has been shown to increase cancer cell proliferation, invasiveness, and/or metastasis. Expression of various components of tight junction such as Claudins and Occludins, as well as gap junction components are also regulated by EMT TFs. Decreased expression of all these junctional proteins by EMT TFs lead to reduced cell–cell attachment and facilitate the transition. EMT TFs have also been shown to up-regulate expression of various mesenchymal markers such as N-cadherin (CDH2), Vimentin, Fibronectin, and matrix metalloproteinases, which together facilitate the mesenchymal cell adhesion, migration, and invasion. In the following section as well as in Table 1, we have discussed the master TFs of EMT, their function as well as the target genes (direct) they regulate.

## Snail family TFs

Snail was first identified in *Drosophila melanogaster* [13], and was found to be essential for mesoderm formation during gastrulation [14]. Subsequently, presence of two additional Snail family proteins, namely escargot and wormiu, were established in the fruit fly. In invertebrates, a single Snail family protein was found, whereas, in vertebrates, three members of the Snail family proteins have been reported, namely, Snail1 (Snail), Snail2 (Slug), and Snail3 (Smuc). In invertebrates such as sea urchin, Snail has been found to suppress expression of E-cadherin (CDH1) and induce delamination of primary mesenchyme cells via EMT. Snail was also found to be critical for fly gastrulation. In vertebrates, during gastrulation, Snail genes are induced by TGF $\beta$  family of proteins, while their expression is maintained by FGF. Indeed, mouse embryos deficient in Snail genes (–/–) fail to gastrulate and exhibit defective mesoderm germ layer formation [15]. Notably, E-cadherin expression is retained in the mesoderm of these embryos, suggesting incomplete EMT. In contrast, Snail2 null (–/–) mice exhibited no EMT failure [16]. In chicken, Snail2 is expressed in the primitive streak and its perturbation does lead to a gastrulation phenotype [17].

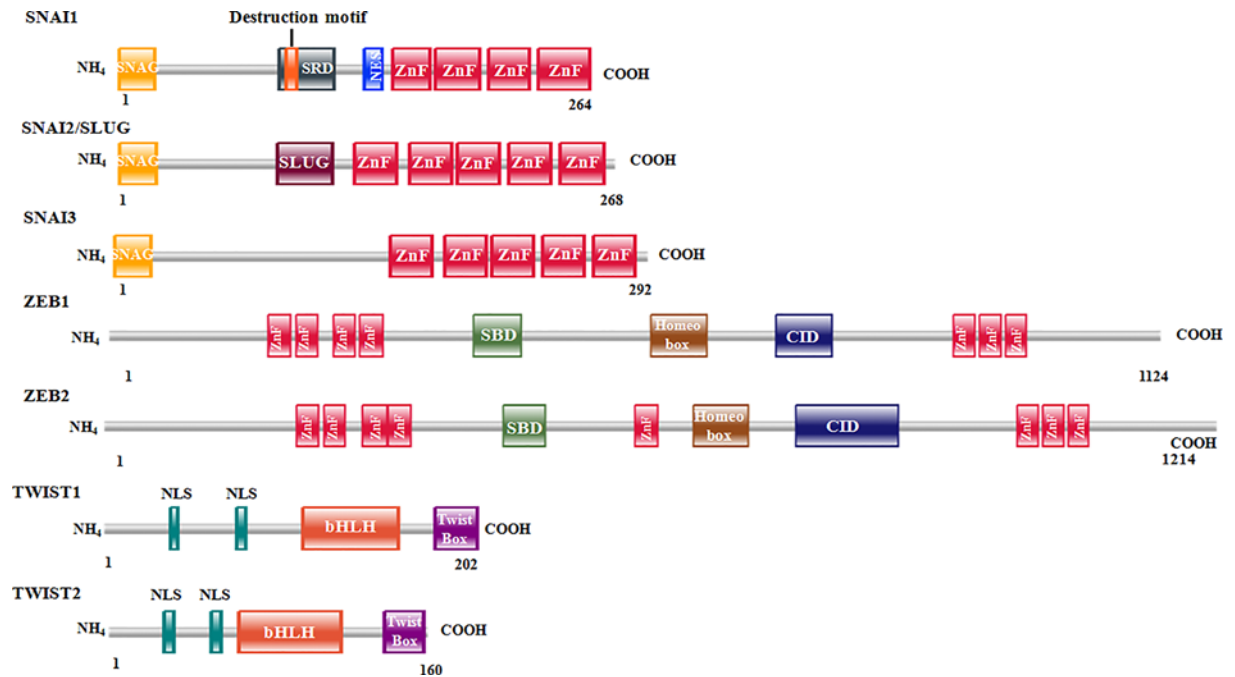

**Figure 2. Structure of master regulators of EMT**

Schematic depiction of EMT master regulators and their respective domains with their comparative size; ZEB2 being the largest and TWIST2 being smallest. SNAI1 and SNAI2 have zinc fingers in their C-terminus, whereas ZEB1 and ZEB2 have zinc fingers on both sides.

**Table 1 Master regulators of EMT**

| EMT TFs    | Effect on EMT (cell/tissue types tested)                               |                                                                                                                                          |                                                                                                                                                          | Direct target genes (cell/tissue types tested)                                                                                                                                                                                                                                                                                                               |
|------------|------------------------------------------------------------------------|------------------------------------------------------------------------------------------------------------------------------------------|----------------------------------------------------------------------------------------------------------------------------------------------------------|--------------------------------------------------------------------------------------------------------------------------------------------------------------------------------------------------------------------------------------------------------------------------------------------------------------------------------------------------------------|
|            | EMT I                                                                  | EMT II                                                                                                                                   | EMT III                                                                                                                                                  |                                                                                                                                                                                                                                                                                                                                                              |
| SNAI1      | Inducer (gastrulation, neural crest development etc.)                  | Inducer (canine kidney cells, adult kidney fibrosis, human corneal endothelium)                                                          | Inducer (colon carcinoma cells, breast cancer, non-small cell lung cancer, oral squamous cell carcinoma, head and neck cancer, hypopharyngeal carcinoma) | CDH1 (kidney cells, breast epithelial cells), SNAI1 (colon cancer cells), Claudin1 (kidney cells), Claudin 7 and Occludin ( <i>in vitro</i> and kidney cells), ZEB1 and MMP9 (hepatoma cells), Vimentin (breast epithelial cells), Fibronectin (colon cancer cells, breast epithelial cells), Twist1 (breast epithelial cells), SNAI2 (ovarian cancer cells) |
| SNAI2/SLUG | Inducer (gastrulation, neural crest development etc.)                  | Inducer (canine kidney cells, keratinocytes)                                                                                             | Inducer (melanoma, colon carcinoma cells)                                                                                                                | CDH1 (kidney cells, breast epithelial cells), ZEB1 (melanoma), Claudin1 (kidney cells)                                                                                                                                                                                                                                                                       |
| ZEB1       | Inducer (gastrulation, neural crest development etc.)                  | Inducer (human alveolar epithelial type II cells, human corneal endothelium, cardiac fibroblasts, lung fibrosis, hepatic stellate cells) | Inducer (melanoma, breast cancer cells, lung cancer cells, pancreatic cancer cells, ameloblastic carcinoma, colorectal cancer cells)                     | CDH1 (breast cancer cells, pancreatic cancer cells), SETD1B (colon cancer cells), ESRP1 (lung cancer cells), Crumbs3, PATJ, Epcam, Elk3 and Plakophilin 3 (breast cancer cells), OVOL2 (breast epithelial cells)                                                                                                                                             |
| ZEB2       | Inducer (gastrulation, mesoderm development, neural crest formation)   | Inducer (cardiac fibrosis)                                                                                                               | Inducer (colon cancer cells, breast cancer cells; ovarian, gastric and pancreatic cancer)                                                                | CDH1, Plakophilin2, ZO-3, Connexin26 (colon cancer cells), Rab25 (breast cancer cells)                                                                                                                                                                                                                                                                       |
| TWIST1     | Inducer (gastrulation, mesoderm development, neural crest development) | Inducer (kidney, lung and skin fibrosis)                                                                                                 | Inducer (breast cancer, colon cancer, prostate cancer)                                                                                                   | SNAI1 (palatal shelves), SLUG (breast epithelial cells), ZEB1 (colon cancer cells), CDH1 (breast cancer cells), CDH2 (breast and prostate cancer cells)                                                                                                                                                                                                      |



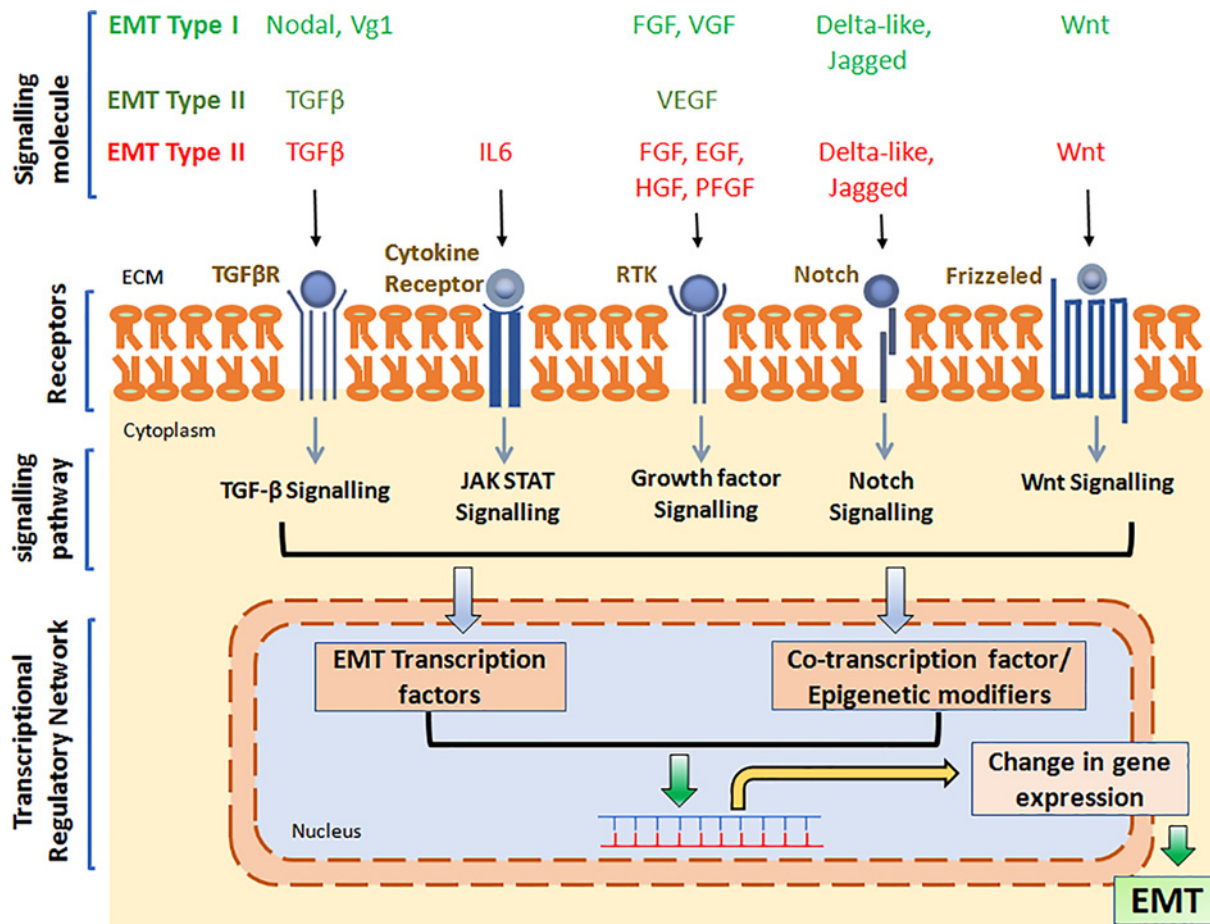

**Figure 3. EMT overview**

EMT is induced by a variety of signaling molecules, which stimulate cognate receptors on the cell surface and thereby activate downstream signaling cascade, leading to activation of EMT TFs and associated co-regulators and epigenetic regulators. This subsequently turns 'on' or 'off' specific genes. The altered transcriptome and proteome further supports the transition.

Activation of Snail1 alone was found to disrupt tissue homeostasis and stimulate adult kidney fibrosis [18]. Snail was shown to trigger the EMT process leading to repression of E-cadherin, Renin, HNF-1 $\beta$  and increased expression of Snail2, Vimentin, SMA, Collagen-I etc., thereby converting epithelial cells into myofibroblasts. Notably, high level of Snail1 was found in patients' fibrotic kidney. Snail2 was found to be expressed in keratinocytes at the migratory front of wound and perturbation of its expression was found to affect the wound healing process [19].

Significantly, expression of Snail family TFs such as Snail and Slug, have been found to correlate positively with reduced E-cadherin expression, increased invasiveness, dedifferentiation status, and aggressiveness in tumor specimens obtained from patients with breast, gastric, colon and hepatocellular carcinoma (HCC), and synovial sarcoma [20–27]. Snail1 was found to be critical for the tumorigenesis and lymph node metastasis of human breast cancer cell line MDA-MB231 as well [28]. Furthermore, Snail1 suppression was shown to inhibit lung cancer cell migration, tumor growth, and metastasis both *in vitro* and *in vivo* [29]. Snail knockdown was also reported to reduce cell motility and stemness of ovarian cancer cells, which in turn reduced the tumor burden in orthotopic xenograft mouse model [30]. Not surprisingly therefore, Snail was shown to activate EMT in a wide variety of cell lines including cancer cells [29,31–39]. Snail1 was further reported to directly regulate expression of many EMT-associated genes such as *CDH1* [31,34,40–42], *SNAI1* [43], *Claudin1* [42,44], *Claudin 7* and *Occludin* [45], *ZEB1* and *MMP9* [46], *Vimentin* [34], *Fibronectin* [47], *Twist1* [48,49], and *SNAI2* [50]. *SNAI2/Slug* was also shown to induce EMT in various cells lines and directly regulate EMT-associated gene expression [42,44,51–53].

It should be noted that all the Snail family members were found to carry a highly conserved C-terminal domain consisting of four to six C2H2-type zinc fingers through which they bind to the E-Box motif, 5'-CANNTG-3', present

in the target gene promoters. Furthermore, the N-terminal domain of vertebrate Snail family members carry a conserved SNAG domain through which they interact with and therefore recruit the Polycomb Repressive Complex (PRC) 2 (PRC2) containing a wide variety of transcriptional co-repressor complexes to the target gene promoters [54,55]. The repressor complex in turn induces H3/H4 deacetylation, H3K4 demethylation and H3K9 and H3K27 hypermethylation, followed by increased DNA methylation through recruitment of DNMTs at the target gene promoter regions. Collectively, all these epigenetic modifications create a state of closed chromatin structure at the target gene promoters, thereby causing silencing of Snail target genes. Interestingly, the Snail family members were also reported to activate target gene transcription by directly binding to the promoter and/or enhancer elements of the target genes in cooperation with different transcriptional activators. It has been shown that the CREB-binding protein, CBP, interacted with Snail and acetylated Lys<sup>146</sup> and Lys<sup>187</sup> residues, thereby inhibiting the formation of the repressor complex [56]. Snail was also found to collaborate with EGR-1 and SP1 to directly bind the MMP9 and Zeb1 promoter and activate their transcription [46].

## Zeb family TFs

The Zeb family of transcriptional regulators consists of two members, Zeb1 (also known as TCF-8 or  $\delta$ EF1) and Zeb2 (also named SIP1). Zeb1 expression during development was found to be inversely proportional to E-cadherin expression in cells of mesoderm origin such as notochord, somites etc. as well as in neural crest derivatives [57]. Zeb1 knockout (−/−) mice die shortly after birth and show severe T-cell deficiency of the thymus as well as skeletal defects of various lineages indicating critical role of the protein during embryogenesis [58]. Zeb2 was also found to play essential roles during embryogenesis, such as during gastrulation in chicken [59], mesodermal development [60], and neural crest development in mice [61]. Zeb2 knockout mice was found to be embryonically lethal with signs of abnormal development of the nervous system [61,62]. It was reported that overexpression of Zeb1 was sufficient to reduce expression of both E-cadherin and p63 and simultaneously enhance vimentin expression in MCF-10A cells. Significantly, increased expression of either of Zeb1 and/or Zeb2 has been found to be associated with poor clinical outcome in various cancer types including breast, colorectum, pancreas, ovarian etc [63–67]. Subsequently, the Zeb family TFs were reported to induce EMT in various cell lines including cancer cells and directly regulate expression of several EMT-associated genes [68–78].

Zeb1 has also been shown to play critical role in promoting fibrosis [79] in human corneal endothelial cells, along with Snail1 [80] as well as in cardiac fibroblasts [81]. Zeb1-mediated paracrine signaling was further shown to induce intestinal lung fibrosis by facilitating the development of profibrogenic microenvironment [82]. Moreover, Zeb1 has been shown to contribute to the profibrotic process by activating the hepatic stellate cells [83]. The other member of the Zeb family, Zeb2, has also been shown to be involved in cardiac fibrosis by facilitating fibroblast to myofibroblast conversion [84].

Both Zeb1 and Zeb2 belong to C2H2 type zinc finger family proteins with a centrally located homeodomain as well as four N-terminal zinc fingers and three C-terminal zinc fingers [85]. Both Zeb1 and Zeb2 were found to bind to the E-box consensus sequence 5'-CANNTG-3' on the CDH1 promoter and suppress its expression through recruitment of repressor protein complex involving C-terminal-binding protein (CtBP), Polycomb proteins and CoREST, as well as through recruitment of SWI/SNF chromatin remodeling complex BRG1 [68,69,73,86]. Moreover, Zeb1 was also found to form a repressor complex with Sirt-1 (a class-III histone deacetylase (HDAC)), which binds the promoter region of CDH1 and suppresses its expression in prostate and pancreatic cancer cells undergoing EMT [87,88]. Significantly, apart from its role as transcriptional repressor, Zeb1 was also found to act as a transcriptional activator, thus inducing the expression of mesenchymal cell-specific genes such as collagen, smooth muscle actin, genes in the vitamin D signaling pathway etc [89–95]. Zeb1 was shown to bind activated Smads as well as the Histone Acetyltransferase p300. These binding abilities of Zeb1 facilitate Smad–p300 complex formation as well as dissociation of Zeb1 from its co-repressor CtBP, thus converting Zeb1 from a transcriptional repressor into a transcriptional activator [92–94]. Recently, ZEB1 was shown to interact with AP-1 factors FOSL1 and Jun as well as the Hippo pathway effector YAP to form a multimeric transactivation complex, which in turn activated tumor-promoting genes in breast cancer cells [96]. Zeb1 was also shown to promote EMT by directly regulating expression of SETD1B (Lysine Methyltransferase induced active epigenetic marks), ESRP1 (epithelial cell-specific splicing regulatory protein), Crumbs3 (involved in epithelial cell polarity as well as tight junction morphogenesis), PATJ (forms part of tight junction as well as epithelial cell polarity), Epcam (epithelial cell adhesion molecule), Plakophilin3 (involved in desmosome-dependent cell adhesion and signaling) etc. Zeb2 was further shown to directly regulate various epithelial-specific junctional proteins such as CDH1, Plakophilin2 (desmosome), ZO3 (tight junction), and Connexin26 (gap junction) (Table 1).

## bHLH family TFs: twist family proteins

The Twist family transcriptional regulators Twist1 and Twist2 belongs to the basic-helix-loop-helix (bHLH) family of proteins. Twist1 was first identified in *Drosophila*, where it was shown to be critical for the embryogenesis process. Twist1 null embryo showed abnormal gastrulation with no mesoderm and failed to survive with a 'twisted' appearance [97,98]. The other member of the Twist family, Twist2 has also been found to be important for embryogenesis. Significantly, Twist was found to regulate the transcriptional switching of E- to N-cadherin [99]. Twist was also found to be critical for EMT during embryogenesis in sea urchin embryos as well as in mice. Twist mutation in mice causes failure in cranial neural tube closure, indicating its role in proper migration and differentiation of neural crest and head mesenchymal cells [100,101]. In fact, Twist1-deficient mouse embryos die at approximately E11.5. Twist was also found to promote tumor cell invasion and subsequent metastasis via stimulation of the EMT process. Additionally, Twist1 was shown to play significant role during tissue fibrosis [102,103].

Interestingly, hypoxia or overexpression of HIF-1 $\alpha$  was reported to induce EMT via activation of Twist. Subsequently, it was shown that HIF-1 $\alpha$  binds directly to the hypoxia-response element at the proximal promoter region of Twist and regulate its expression [104]. Twist1 by itself was able to induce EMT when overexpressed in breast and kidney epithelial cells [105]. Notably, Twist1 was demonstrated to induce N-cadherin transcription by binding to the E-box *cis*-element located within the first intron of the N-cadherin gene in prostate cancer cells [106]. Moreover, it could also bind the E-cadherin promoter directly and repress E-cadherin gene expression [107]. Further study revealed that Twist1 interacted with several components of the Mi2/nucleosome remodeling and deacetylase (Mi2/NuRD) complex such as MTA2, RbAp46, Mi2 and HDAC2, and recruited them to the proximal regions of the E-cadherin promoter for transcriptional repression of the gene [108]. Additionally, methylation of Twist1 by PRMT1 at residue R34 was shown to affect the E-cadherin transcriptional repression [109].

## Other EMT TFs

Significantly, findings from multiple labs over the years have also identified many additional TFs besides the master regulators of EMT, that are found to play significant role during EMT under various contexts. This suggests that EMT is probably regulated by a much larger group of TFs than previously thought. In this section, we shall focus on these 'other' DNA-binding EMT TFs and discuss their involvement in EMT including their known direct targets (Table 2).

## E2A proteins: E12/E47 TFs

E12 and E47, members of the class I bHLH TFs, and splice variants of the gene *E2A/TCF3* were shown to induce EMT in human renal proximal tubular cells and in MDCK cells [110–112]. Furthermore, it was demonstrated that E47 can directly bind to E-box element at the E-Cadherin promoter and suppress its expression. Additionally, Zhu et al. showed that the p21-activated kinase 5 (PAK5) phosphorylates E47 at S39 at the cytosol and promotes its entry into the nucleus in an Importin- $\alpha$ -dependent manner. This phosphorylation-induced nuclear entry was found to be critical for E47 to promote EMT and colon cancer metastasis [113].

## Krüppel-like factor family of TFs

Krüppel-like factor 4 (KLF4) has been shown to act as a negative regulator of EMT or even inducer of MET in a wide variety of cell/tissue types by different laboratories [114–123]. In fact, KLF4 expression was found to be down-regulated in cells undergoing EMT in presence of TGF $\beta$ . Subsequently, Li et al. have shown that KLF4 can directly bind to CDH1 promoter and activate its transcription [120]. KLF4 mediated direct promoter binding and suppression of Serine/Threonine kinase 33 (STK33) was further shown to cause reversal of EMT [121].

KLF8 has been shown to induce EMT in MDCK, MCF-10A and pancreatic cancer cell line Panc-1 [124,125]. In fact, its expression was found to be enhanced in gastric cancer cell line SGC7901 undergoing EMT in presence of TGF $\beta$  [126]. Moreover, silencing of Klf8 was shown to inhibit induction of EMT in this cell line when exposed to TGF $\beta$ . Mechanistically, Klf8 was reported to bind directly to the CDH1 promoter at a site distinct from E-boxes and suppress its expression [124].

KLF10, another Krüppel-like factor family protein, has been reported to suppress TGF $\beta$ -induced EMT in A549 and Panc-1 cell lines. It was further shown to bind to the SNAI2 (Slug) promoter, recruit HDAC1, and repress its expression [127]. Significantly, *Klf10*-deficient mice showed increased incidence of lung tumor formation as well as increased tumor size compared with wildtype mice, when exposed to 7,12-dimethylbenz(a)anthracene (DMBA).

**Table 2 Other EMT TFs**

| EMT TFs | Effect on EMT (cell/tissue types tested) |                                                               |                                                                                                                                                                                                            | Direct target genes (cell/tissue types tested)                                                                 |
|---------|------------------------------------------|---------------------------------------------------------------|------------------------------------------------------------------------------------------------------------------------------------------------------------------------------------------------------------|----------------------------------------------------------------------------------------------------------------|
|         | EMT I                                    | EMT II                                                        | EMT III                                                                                                                                                                                                    |                                                                                                                |
| E12/E47 | -                                        | Inducer (renal proximal tubular epithelial cells, MDCK cells) | Inducer (colon cancer metastasis)                                                                                                                                                                          | CDH1 (MDCK cells)                                                                                              |
| KLF4    | -                                        | -                                                             | Suppressor (lung epithelial cells, nasopharyngeal carcinoma cells, hepatocellular carcinoma cells, lung cancer cells, human endometrial carcinoma cells, pancreatic cancer cells, colorectal cancer cells) | CDH1 (nasopharyngeal carcinoma cells)                                                                          |
| KLF8    | -                                        | -                                                             | Reversal of EMT (gastric cancer cells)                                                                                                                                                                     | Serine/threonine kinase 33 (gastric cancer cells)                                                              |
| KLF10   | -                                        | -                                                             | Inducer (MDCK, MCF-10A, Panc-1, gastric cancer cell line SGC7901, breast cancer cells)                                                                                                                     | CDH1 (breast cancer cells)                                                                                     |
| FOXC1   | -                                        | -                                                             | Suppressor (A549, Panc-1)                                                                                                                                                                                  | SLUG (A549, Panc-1)                                                                                            |
| FOXC2   | -                                        | -                                                             | Inducer (esophageal cancer, nasopharyngeal cancer, basal like breast cancer, glioma, cervical cancer, and hepatocellular carcinoma)                                                                        | FGFR1 (NMuMG cells), ZEB2 (esophageal cancer cells)                                                            |
| FOXQ1   | -                                        | -                                                             | Inducer (mouse mammary carcinoma cell, mammary epithelial cells, basal-type human breast cancer cells, ovarian cancer cells)                                                                               | ZEB1 (breast cancer cells)                                                                                     |
| FOXK1   | -                                        | -                                                             | Inducer (basal-like breast cancer, Mammary, bladder and colon epithelial cells, gastric cancer cells)                                                                                                      | CDH1 (breast cancer cells), CDH2 (breast cancer cells)                                                         |
| FOXG1   | -                                        | -                                                             | Inducer (colon cancer cells)                                                                                                                                                                               | ND                                                                                                             |
| FOXM1   | -                                        | -                                                             | Inducer (human hepatocellular carcinoma cells)                                                                                                                                                             | ND                                                                                                             |
| FOXF2   | -                                        | -                                                             | Inducer (non-small cell lung cancer, kidney cells)                                                                                                                                                         | ND                                                                                                             |
| FOXN2   | -                                        | -                                                             | Suppressor (basal-like breast cancer cells, triple-negative breast cancer cells)                                                                                                                           | TWIST1, FOXC2, FOXQ1 (basal-like breast cancer cells)                                                          |
| FOXO3a  | -                                        | -                                                             | Suppressor (breast cancer cells)                                                                                                                                                                           | SLUG (breast cancer cells)                                                                                     |
| SOX4    | -                                        | -                                                             | Suppressor (prostate cancer cells)                                                                                                                                                                         | ND                                                                                                             |
| SOX9    | Inducer (neural crest development)       | Inducer (liver fibrosis)                                      | Inducer (mammary epithelial cells, breast cancer cells, triple-negative breast cancer cells, lung carcinoma cells, gastric cancer cells, prostate cancer cells, renal cancer cells)                        | EZH2 (NMuMG cells), ADAM28 (human breast and lung carcinoma cells), CDH2 (triple-negative breast cancer cells) |
| SOX11   | -                                        | -                                                             | Inducer (thyroid cancer cells, prostate cancer cells, non-small cell lung cancer cells, gastric cancer cells, human oral squamous carcinoma cells, gastric carcinoma cells)                                | ND                                                                                                             |
| RUNX1   | -                                        | Inducer (renal fibrosis)                                      | Inducer (breast cancer cells)                                                                                                                                                                              | SLUG (breast cancer cells)                                                                                     |
| RUNX2   | Inducer (chicken atrioventricular canal) | Inducer (lung fibrosis)                                       | Promoted epithelial-mesenchymal hybrid characteristics (ER-negative DCIS.com breast cancer cell)                                                                                                           | ND                                                                                                             |
|         |                                          |                                                               | Inducer (colorectal cancer cells, kidney epithelial cells)                                                                                                                                                 | p110δ (renal tubular epithelial cells)                                                                         |
|         |                                          |                                                               | Inducer (thyroid cancer cells, hepatocellular cancer cells, renal cell carcinoma cells, non-small cell lung cancer cells)                                                                                  | ND                                                                                                             |

Continued over

Downloaded from <http://port.silverchair.com/biosciencereports/article-pdf/42/1/BSR20211754/927043/bsr-2021-1754.pdf> by guest on 24 April 2024



**Table 2 Other EMT TFs (Continued)**

| EMT TFs   | Effect on EMT (cell/tissue types tested)                                                                                           |                                                    |                                                                                                                                             | Direct target genes (cell/tissue types tested)                                                                                                                    |
|-----------|------------------------------------------------------------------------------------------------------------------------------------|----------------------------------------------------|---------------------------------------------------------------------------------------------------------------------------------------------|-------------------------------------------------------------------------------------------------------------------------------------------------------------------|
|           | EMT I                                                                                                                              | EMT II                                             | EMT III                                                                                                                                     |                                                                                                                                                                   |
| GATA4     | Inducer of cell migration (gastrulation)                                                                                           | -                                                  | Inducer (nasopharyngeal carcinoma cell)<br>Induce moderate MET (hepatocellular carcinoma cells)                                             | SLUG (nasopharyngeal carcinoma cell)                                                                                                                              |
| GATA6     | Serpent, ortholog of human GATA6 acts as inducer of EMT in <i>Drosophila</i> endoderm.<br>Inducer of cell migration (gastrulation) | Inducer (canine kidney cells)                      | Inducer (cholangiocarcinoma cells, breast cancer cells)<br>Suppressor (pancreatic cancer cells)                                             | MUC1 (cholangiocarcinoma cells), SNAI2 (breast cancer cells), crumbs ( <i>Drosophila</i> endoderm, canine kidney cells)<br>CDH1 and VIM (pancreatic cancer cells) |
| WT1       | Inducer of MET in early kidney development; Inducer (epicardial cells); suppressor (human adult epicardial cells)                  | Inducer (lung fibrosis)                            | Inducer (ovarian cancer cells)<br>Promoted epithelial–mesenchymal hybrid state (clear cell renal cell carcinoma)                            | SNAI1 (epicardial cells), CDH1 (epicardial cells, ovarian cancer cells), SLUG (epicardial cells)                                                                  |
| Goosecoid | Inducer of cell migration (gastrulation)                                                                                           | -                                                  | Inducer (breast cancer cells, hepatocellular carcinoma cells)                                                                               | ND                                                                                                                                                                |
| Six1      | -                                                                                                                                  | Inducer (lung epithelial cell fibrosis)            | Inducer (mammary carcinoma cells, colorectal cancer cells, cervical cancer cells, lung epithelial cells, immortalized human keratinocytes)  | ND                                                                                                                                                                |
| Prrx1     | Inducer (chicken embryo)                                                                                                           | Inducer (hepatic fibrosis, canine kidney cells)    | Inducer (gastric cancer cells, non-small cell lung cancer cells, salivary adenoid cystic carcinoma cells)<br>Suppressor (lung cancer cells) | ND<br>ND                                                                                                                                                          |
| Elk3      | -                                                                                                                                  | Inducer (liver fibrosis)                           | Inducer (breast cancer cells)                                                                                                               | ND                                                                                                                                                                |
| Brachyury | Required for mesoderm formation as well as cell movement during gastrulation                                                       | Inducer (kidney fibrosis)                          | Inducer (pancreatic cancer cell line, lung carcinoma cells, oral squamous carcinoma cells, kidney cells)                                    | ND                                                                                                                                                                |
| FOSL1     | -                                                                                                                                  | -                                                  | Inducer (prostate cancer cells, non-small cell lung cancer cells, mammary epithelial cells)                                                 | TGFB1, ZEB1, ZEB2 (mammary epithelial cells)                                                                                                                      |
| FOSL2     | -                                                                                                                                  | -                                                  | Inducer (prostate cancer cells, non-small cell lung cancer cells)                                                                           | ND                                                                                                                                                                |
| JunB      | -                                                                                                                                  | Inducer (kidney fibrosis)                          | Inducer (mammary epithelial cells, uveal melanoma cells)                                                                                    | ND                                                                                                                                                                |
| OVOL1     | -                                                                                                                                  | -                                                  | Suppressor (prostate cancer cells, triple negative breast cancer cell)                                                                      | ND                                                                                                                                                                |
| OVOL2     | Inducer of MET (fibroblasts)                                                                                                       | -                                                  | Suppressor (prostate cancer cells, triple negative breast cancer cell)                                                                      | ZEB1 (prostate cancer cells)                                                                                                                                      |
| ALX1      | -                                                                                                                                  | -                                                  | Inducer (ovarian cancer cells, breast epithelial cells)                                                                                     | ND                                                                                                                                                                |
| ZBTB38    | -                                                                                                                                  | -                                                  | Inducer (bladder cancer cells)                                                                                                              | ND                                                                                                                                                                |
| TFAP2A    | -                                                                                                                                  | Positive regulator (human ventricular fibroblasts) | Suppressor (breast epithelial cells)                                                                                                        | ZEB2 (breast epithelial cells)                                                                                                                                    |
| BACH1     | -                                                                                                                                  | Inducer (lung fibrosis)                            | Inducer (esophageal squamous cell carcinoma, pancreatic cancer metastasis)                                                                  | CDH2, SNAI2, Vimentin, VEGFC (esophageal squamous cell carcinoma)                                                                                                 |

Downloaded from <http://port.silverchair.com/biosci/article-pdf/42/1/BSR20211754/927043/bsr-2021-1754.pdf> by guest on 24 April 2024

## Forkhead box family of TFs

The Forkhead box family member FOXC1 expression was elevated in mammary epithelial cells undergoing EMT in presence of TGFβ. FOXC1 was shown to directly bind an upstream regulatory region of the FGFR1 gene, a member of the Fibroblast Growth Factor Receptor family and promote isoform switching. FGFR1 has been shown to induce EMT in urothelial carcinoma cells [128]. Knockdown experiments revealed a regulatory role for FOXC1 in cell migration and invasion. [129]. Furthermore, FOXC1 has been reported to play significant role during EMT in a variety of

cancers such as esophageal cancer, nasopharyngeal cancer, basal-like breast cancer, glioma, cervical cancer, and HCC [130–134]. Mechanistically, FOXC1 was shown to stimulate EMT in esophageal cancer cells by binding to the Zeb2 promoter directly in a pre-B-cell leukemia homeobox 1 (PBX1)-dependent manner and thereby induce its expression [131].

Another member of the Forkhead family of TFs, FOXC2 was shown to play a key role during EMT. Elevated level of FOXC2 was found in mouse mammary carcinoma cells undergoing EMT in presence of TGF $\beta$ . Ectopic expression of master regulators of EMT such as Snail and Twist, has also been shown to induce FOXC2 expression. Subsequently, FOXC2 was found to be required to induce mesenchymal characteristics as a part of the EMT program [135,136]. Significantly, overexpression and knockdown studies have further showed that FOXC2 is essential for the stem cell characteristics linked with EMT in mammary epithelial cells [136]. All these experimental observations suggest a crucial role for FOXC2 in tumorigenesis and/or metastasis process. Indeed, its expression was found to be significantly correlated with highly aggressive basal type human breast cancer [135]. Additionally, FOXC2 was also shown to be a critical regulator of EMT in ovarian cancer cells as well [137]. Mechanistically, p38-mediated phosphorylation of FOXC2 at S367 residue was found to be essential for the EMT process. The phosphorylated form of FOXC2 was shown to bind to the Zeb1 promoter and regulate its expression, thereby, regulating the EMT, and subsequently, metastasis [138].

Expression of FOXQ1 has been found to be significantly correlated with highly aggressive basal-like breast cancers with poor clinical outcome [139]. Indeed, increased level of FOXQ1 was shown to be important for TGF $\beta$ -induced EMT and its associated characteristics in mammary, bladder, and colon epithelial cells [139–141]. Additionally, FOXQ1 was also found to regulate EMT in gastric cancer cells. Not surprisingly therefore, high expression level of FOXQ1 was observed to be associated with poor prognosis in gastric cancer patients [142]. Subsequently, FOXQ1 was shown to bind to the E-cadherin and the N-cadherin promoter directly and regulate their expression [139,140,143].

FOXX1 was shown to be up-regulated in colon cancer cells undergoing EMT in presence of TGF $\beta$ . Both overexpression and knockdown studies have shown that FOXX1 plays a significant role in regulating TGF $\beta$ -induced EMT in colorectal cells [144].

Elevated level of FOXG1, has been reported to be associated with increased incidence of metastasis in human HCC. In fact, FOXG1 was found to play an essential role in HCC cells undergoing EMT. It was shown that FOXG1 activated Wnt signaling pathway through its association with  $\beta$ -Catenin and LEF1/TCF4, and thereby induced EMT [145].

Increased expression of FOXM1 has also been shown to significantly correlate with EMT marker proteins in tissue specimens from non-small cell lung cancer (NSCLC) patients. Subsequently, FOXM1 was reported to regulate EMT in the NSCLC cells through activation of AKT/p70S6K pathway [146]. FOXM1 was further shown to be induced by TGF $\beta$  in kidney cells undergoing EMT, where it was demonstrated to play a significant role [147].

Although the Forkhead box TFs as discussed above have been shown to regulate EMT in a positive manner, a few of the members of the family, such as FOXF2, FOXN2, and FOXO3a have been found to act as EMT suppressor [148–151]. FOXF2 has been shown to be a negative regulator of EMT in basal-like breast cancer cells and also in triple-negative breast cancer cells. Indeed, FOXF2 deficiency led to increased incidence of metastasis *in vivo* [148]. Mechanistically, FOXF2 was found to be directly recruited at the promoter region of EMT promoting TFs such as Twist1, FOXC2, and FOXQ1 and repress their transcription, and thereby suppress EMT [148,152,153]. Moreover, FOXF2 was shown to recruit nuclear receptor corepressor 1 (NCoR1) and HDAC3 to the FOXQ1 promoter to repress its transcription. FOXN2, on the other hand, repressed Slug expression by binding to its promoter directly and thereby inhibiting its transcription [149]. FOXO3a, another member of the Forkhead box family, has been reported to play a negative regulatory role during EMT in prostate cancer cells. It was shown to suppress the  $\beta$ -Catenin pathway by reducing its expression via activation of miRNA-34b/c, as well as by directly binding to  $\beta$ -Catenin, and thereby blocking the  $\beta$ -Catenin/TCF4 complex formation required for the activation of  $\beta$ -Catenin signaling pathway [150].

## **SRY-related HMG-box family of TFs**

SRY-related HMG-box 4 (Sox4), one of the members of the SRY-related HMG-box family TFs has been shown to play significant role during EMT in various cell types including mammary epithelial cells, breast cancer cells, gastric cancer cells, prostate cancer cells, renal cancer cells etc [154–160]. SOX4 expression level was enhanced in TGF $\beta$ -treated cells undergoing EMT and was shown to promote mesenchymal characteristics as a part of EMT. Notably, high SOX4 expression level was found to be significantly correlated with triple-negative breast cancer [154], breast cancer metastasis [155], as well as gastric cancer [160]. SOX4 was further demonstrated to directly bind to the upstream regulatory region of Polycomb-group histone methyltransferase EzH2 [155], metalloproteinase ADAM28 [161] and N-Cadherin [157], thereby activating their transcription. Significantly, EzH2 was further shown to be a critical regulator of EMT in

mammary epithelial cells. Interestingly, Wang et al. [158], showed that the ETS transcription factor ERG, which is induced in prostate cancer cells undergoing EMT, binds to the SOX4 promoter directly and stimulates its transcription. Moreover, SOX4 was shown to interact with ERG itself and promote EMT in prostate cancer cells.

The TF, SOX9, was found to be required for neural crest development [162,163]. Moreover, it was also shown to be expressed during hepatic stellate cell activation and caused type I Collagen production in presence of TGF $\beta$  [164]. SOX9 has further been reported to promote EMT in various cancer types such as thyroid cancer [165], prostate cancer [166], NSCLC [167], and gastric cancer cells [168]. It was also shown to be elevated in TGF $\beta$  treated human oral squamous cell carcinoma cells [169]. Mechanistically, SOX9 was shown to activate the Hippo-Yap signaling pathway in gastric carcinoma cells and Wnt/ $\beta$ -Catenin pathway in NSCLC cells to induce the EMT process. SLUG was further shown to directly interact with SOX9, thus blocking its ubiquitin-mediated proteosomal degradation, and thereby stabilizing it [170].

Another SOX family member SOX11 has also been shown to play significant role during EMT in breast cancer cells. It was reported to directly bind Slug promoter and induce its expression [171]. Interestingly, Oliemuller et al. have shown that SOX11 could promote epithelial–mesenchymal hybrid characteristics in breast cancer cell population [172]. The authors further demonstrated that SOX11 activity towards EMT is partially mediated by a potential downstream effector molecule, MEX31.

## RUNX family transcription factors RUNX1/2

RUNX1 has been shown to play significant role during EMT in colorectal cancer cells [173,174]. Indeed, TGF $\beta$  treatment was found to induce RUNX1 expression in colorectal cancer cells as well as in kidney epithelial cells undergoing EMT [174,175]. Moreover, RUNX1 was shown to promote renal fibrosis by activating transcription of PI3K subunit p110 $\delta$  [175]. Mechanistically, RUNX1 was found to activate the Wnt/ $\beta$ -Catenin signaling pathway to promote EMT. In renal tubular epithelial cells, RUNX1 was shown to promote TGF- $\beta$ -induced partial EMT by activating transcription of the PI3K subunit p110 $\delta$ , which mediated Akt activation [175]. Additionally, RUNX2 was also shown to play significant role during EMT in thyroid carcinoma, hepatocellular cancer, renal cell carcinoma, and NSCLC cells [176–178]. In fact, both overexpression and knockdown studies with RUNX2 were shown to perturb the EMT process. Furthermore, a specific RUNX2 isoform has been shown to play critical role in mediating EMT in the developing heart of chick embryo independent of Snail2 [179]. Significantly, RUNX2 was also shown to facilitate pulmonary fibrosis [180].

## GATA family TFs

Zhou et al., employed both overexpression and knockdown studies to demonstrate that GATA4 is an inducer of EMT in nasopharyngeal carcinoma cell line. They further showed that GATA4 activated SLUG transcription by directly binding to its promoter region [181]. Interestingly though, GATA4 was also shown to induce moderate MET in HCC cells and cellular senescence by activating NF- $\kappa$ B pathway [182].

Another member of the GATA family TF GATA6 has been shown to induce EMT in cholangiocarcinoma cells. Both overexpression and knockdown studies were shown to affect the EMT process. GATA6 was shown to up-regulate Mucin-1 (*MUC1*) gene, a membrane-bound glycosylated protein involved in forming protective mucous barrier on epithelial cells, by directly binding to its promoter region [183]. It was reported to promote EMT in breast cancer cells as well, where it was shown to bind SLUG promoter and stimulate its transcription [184]. Campbell et al., found that GATA-factor Serpent (*Srp*) in *Drosophila*, an ortholog of human GATA6 is essential for EMT in the *Drosophila* endoderm. The authors further showed that *Srp* suppresses crumbs (*crb*), an epithelial cell polarity and adherens junction regulator, by directly binding to its promoter. Moreover, they also showed that human GATA6, when ectopically expressed, can induce EMT in MDCK cells in a similar fashion [185]. Martinelli et al., on the other hand, found that GATA6 acts as an inhibitor of EMT in pancreatic cancer cells. The authors further showed that GATA6 directly bound promoter regions of E-cadherin and Vimentin and regulated their transcription [186]. Significantly, both GATA4 and GATA6 have been shown to play critical role in cell migration during gastrulation in *Xenopus* embryo.

**Wilms' tumor 1 (WT1)** protein has been shown to play crucial role during both EMT and MET in a tissue-dependent manner, thereby maintaining the epithelial–mesenchymal balance. Indeed, WT1 was reported to promote MET during kidney development, but also induced EMT during heart development. It was shown to activate Snail1 and repress E-Cadherin by directly binding respective upstream regulatory elements in epicardial cells and during ES cell differentiation [187]. WT1 was found to act as EMT promoter in ovarian cancer cells as well, where it was shown to bind to the E-Cadherin promoter and thereby suppress its expression. It also activated the ERK1/2

signaling pathway in the same context [188]. Notably, several reports also showed EMT opposing function for WT1 protein. Noortje et al. reported that WT1 expression was suppressed in human adult epicardial cells upon TGF $\beta$  exposure. Furthermore, knockdown of WT1 was also lead to induction EMT in epicardial cells, where WT1 was shown to bind to Slug promoter and suppress its activity [189,190]. Interestingly, Sampson et al. reported that WT1 could induce a hybrid epithelial–mesenchymal state in clear cell renal cell carcinoma, where it stimulated expression of epithelial markers, such as E-cadherin and at the same time up-regulated expression of Snail, an EMT promoter [191]. It should also be noted that WT1 was shown to function as a key regulator during mesothelial–myofibroblast and fibroblast–myofibroblast transformation, therefore highlighting its role during tissue fibrosis [192].

The homeobox TF, **Gooseoid**, has been demonstrated to induce EMT in both breast cancer cells and HCC cells [193,194]. In fact, Gooseoid expression was found to be elevated in breast epithelial cells undergoing EMT when exposed to TGF $\beta$ . It also increased the incidence of lung metastases in mice [193,194]. Significantly, high Gooseoid level correlated well with poor survival and increased lung metastases in HCC patients [194]. It should be noted that Gooseoid has been shown to regulate cell migration in *Xenopus* embryo during gastrulation [195].

The homeobox TF, **Six1**, was shown to be involved during EMT in human mammary carcinoma cells [196], colorectal cancer cells [197], immortalized human keratinocytes [198], cervical cancer [199] as well as in lung epithelial cells [200]. Wang et al. have further reported that the Six1 protein level goes up in lung epithelial cells undergoing EMT when exposed to TGF $\beta$ . Importantly, Six1 was shown to play a significant role during conversion of lung epithelial cells into fibroblasts and associated airway remodeling [201].

Paired-related homeobox 1 (**PRRX1**) has been found to induce EMT in gastric cancer cells, NSCLC cells as well as in salivary adenoid cystic carcinoma cells [202–204]. Ocana et al. showed that PRRX1 could induce full EMT in chicken embryo as well as in MDCK cell line. The authors further demonstrated that loss of PRRX1 is required for the cancer cells to metastasize, whereby the cells regain epithelial characteristics needed to form colonies at the secondary site [205]. Prrx1 was further shown to induce hepatic stellate cell movement during liver fibrosis [206]. Mechanistically, PRRX1 was shown to induce EMT by activating the Wnt/ $\beta$ -Catenin pathway in gastric cancer cells [202]. Interestingly, Zhu et al., observed that knockdown of PRRX1 led to induction of EMT in the lung cancer cell line A549. PRRX1-deficient A549 cells were further shown to acquire cancer stem cell-like properties [207].

**Elk3** has been shown to positively influence EMT in breast cancer cells as well as during progression of liver fibrosis [208–210]. Indeed, Elk3 expression was up-regulated in breast cancer cells and liver cells following TGF $\beta$  treatment. Subsequently, SMAD3 and ZEB1 both were found to directly regulate Elk3 expression by binding to its promoter region [209,210]. ZEB1 was further shown to form complex with Elk3 and suppress E-Cadherin expression [209].

The T-box TF, **Brachyury**, was shown to promote EMT in pancreatic cancer cell line and lung carcinoma cells [211]. Moreover, Brachyury expression was found to be correlated well with EMT as well as lymph node metastasis in oral squamous cell carcinoma [212]. Furthermore, Brachyury expression was also reported to be up-regulated in kidney cells undergoing EMT in presence of TGF $\beta$  [213]. It was suggested that Brachyury probably binds the half T-element present on the E-cadherin promoter and thereby suppresses its expression. In addition, Brachyury has been shown to be play significant role in cell movement during gastrulation as well as mesoderm formation [214]. It was also found to promote renal interstitial fibrosis [213].

## AP-1 transcription factor

Both **FOSL1** and **FOSL2** have been reported to promote EMT in prostate cancer cells and NSCLC cells [215,216]. FOSL1/FRA-1 was further reported to induce EMT in mammary epithelial cells through direct binding of the TGF $\beta$ 1 and ZEB2 promoters as well as the first intron of ZEB1 and thereby regulating their expression [217]. **JunB** was shown to be involved during EMT in mammary epithelial cells [218]. Here JunB expression was reported to be elevated in mammary epithelial cells undergoing EMT in presence of TGF $\beta$ . Moreover, JunB was found to suppress Id2 (inhibitor of EMT) expression in cooperation with ATF3, a basic leucine zipper protein. Gong et al. showed that JunB could play a key role in IL6-stimulated EMT and aggressiveness in uveal melanoma cells [219]. Additionally, JunB has been shown to promote EMT in human renal tubular cell line. Here, ETS2, a member of conserved TFs of the ETS family, was demonstrated to directly bind to the JunB promoter and enhance its transcription [220]. Notably, the m6A methyltransferase METTL3, was also shown to stabilize the JunB mRNA, in lung cancer cells undergoing EMT [221].

Roca et al. have shown that **OVOL1** and **OVOL2** act as critical regulators of MET in mesenchymal prostate cancer cells and triple-negative breast cancer cell line. They further showed that OVOL2 binds to ZEB1 promoter directly and suppresses its transcription [222]. Watanabe et al., have recently reported that OVOL2 could induce MET in fibroblasts in cooperation with tissue specific re-programming factors such as KLF4 and TP63 [223]. Zinc finger and BTB domain-containing 38 (**ZBTB38**) has been reported to promote EMT in bladder cancer cells by activating



Wnt/ $\beta$ -Catenin signaling pathway [224]. The Aristaless-like homeobox1 (**ALX1**) or Cart1 TF has been shown to induce EMT in ovarian cancer cells and breast epithelial cells in a Snail1-dependent manner [225]. The TF, **TFAP2A**, expression was reduced in breast epithelial cells undergoing EMT in presence of TGF $\beta$ . It was further shown to negatively regulate the EMT process by directly binding to ZEB2 promoter and repressing its transcription [226]. Interestingly, deletion of TFAP2A has been shown to inhibit fibroblast to myofibroblast conversion, indicating its possible role during tissue fibrosis [227]. Zhao et al. have identified BTB Domain and CNC Homolog 1 (**BACH1**) TF as promoter of EMT in esophageal squamous cell carcinoma cells. They have shown that BACH1 directly binds to the promoter region of CDH2, SNAI2, Vimentin, and VEGFC genes and regulate their transcription [228]. BACH1 was further shown to induce EMT and promote pancreatic cancer metastasis (Sato et al., *Cancer Res.* (2020) **80**(6), 1279–1292). Significantly, inhibition of BACH1 has been found to attenuate bleomycin-induced lung fibrosis in mouse [229,230].

Recently, Meyer-Schaller et al. used siRNA-based, functional microscopy screen to identify 46 (co)transcription factors along with multiple miRNAs that were shown to play essential roles in mammary epithelial cells undergoing EMT in presence of TGF $\beta$  [231]. In this study, transcriptomics, interactome analysis, and computational analysis were done to reveal transcriptional regulatory networks regulating the EMT process in normal mouse as well as human mammary epithelial cells. Along with known EMT TFs, this study also identified few novel EMT TFs/co-regulators. Additionally, helicases such as DDX5, DDX20/DP103, and DHX9/DDX9 have also been implicated in cancer aggressiveness [232–234]. Phosphorylated form of DDX5 (p-DDX5) was shown to mediate EMT by activating the Wnt/ $\beta$ -Catenin pathway [235]. It has also been found to stimulate Snail1 transcription by facilitating HDAC1 dissociation from the Snail1 promoter [236]. On the other hand, ectopic expression of DDX20/DP103 has been shown to enhance invasive abilities of breast cancer cells. Furthermore, its expression was also found to be correlated with metastasis gene signature as well as breast cancer metastasis [232]. Moreover, combination of DDX20/DP103 along with Amphiregulin and Cyclin A1 has been correlated with aggressive forms of oral squamous cell carcinoma with up-regulated EMT-associated gene signature [234]. DHX9/DDX9 has been found to inhibit EMT in human lung adenocarcinoma cells via STAT3 modulation [237]. Additionally, it was also shown to modulate circulatory RNAs during EMT [238]. Ring1b, a core component of the PRC1 has been shown to form complex with DEAD-box RNA helicases such as DDX3X and DDX5 and down-regulate E-cadherin by binding to its promoter [239].

## Transcriptional regulatory network in EMT

From the above discussion, it is evident that EMT is regulated by many TFs. Some of these EMT TFs such as Snail, Zeb, and Twist can control the process in totality, whereas others such as FOXC1, FOXC2, and RUNX1 can control only part of it. Infact, few of the identified TFs such as SOX11 and WT1 were found to induce a hybrid epithelial–mesenchymal state, thereby creating a flexible, plastic situation within the cell. Significantly, expressions of all these EMT TFs have been found to be regulated in a spatiotemporal manner under both normal physiological and pathological conditions. As a result, their contribution towards EMT were found to vary depending upon the cell/tissue types involved as well as EMT context/types (Tables 1 and 2 and above sections). Indeed, some of these TFs such as SNAI1 and ZEB1 were shown to induce EMT in most of the tumor cell/tissue types tested, while few others such as GATA4, GATA6, PRRX1 etc. were found to promote EMT in certain cell/tissue types only, and even block the EMT process in others. For example, GATA4 has been shown to induce EMT in nasopharyngeal carcinoma cells, whereas it was found to induce MET in HCC cells. GATA6 has been shown to induce EMT in breast cancer cells, however it was found to suppress EMT in pancreatic cancer cells (Tables 1 and 2). Different phenotypes exhibited by various EMT TF mutants during embryonic development also suggest differential contribution of these EMT regulators towards EMT. Table 1 further shows that the master regulators of EMT such as Snail1, slug, Zeb1, Zeb2, and Twist1 play critical roles during EMT in all different contexts, such as EMT types I, II, and III. On the other hand, as shown in Table 2, very few of the other EMT TFs were shown to take part in all EMT contexts. In fact, most of these other EMT TFs such as KLF or FOX family members mentioned in the text/Table 2, were shown to be involved during EMT associated with the carcinogenesis process only (EMT type III). This suggests that the combination of EMT TFs involved in a specific context might vary. Significantly, along with common EMT-associated functions, these EMT TFs have also been found to exert non-redundant functions. Indeed, besides metastasis, EMT and therefore EMT-TFs have been shown to participate in other processes such as resistance to cell death and senescence, resistance to different types of therapy, immune regulation, acquisition of stem cell-like characteristics etc., that are important for carcinogenesis (type III EMT). In addition, EMT TFs are involved in different morphogenetic functions including left-right asymmetry regulation, bone morphogenesis, neural tube morphogenesis etc. Possible reason for this pleiotropic behavior of EMT TFs include the nature of the EMT inducer(s) as well as the upstream signaling pathway(s) involved under different contexts. Importantly, different inducer and/or upstream signaling could also influence differential expression of factors other

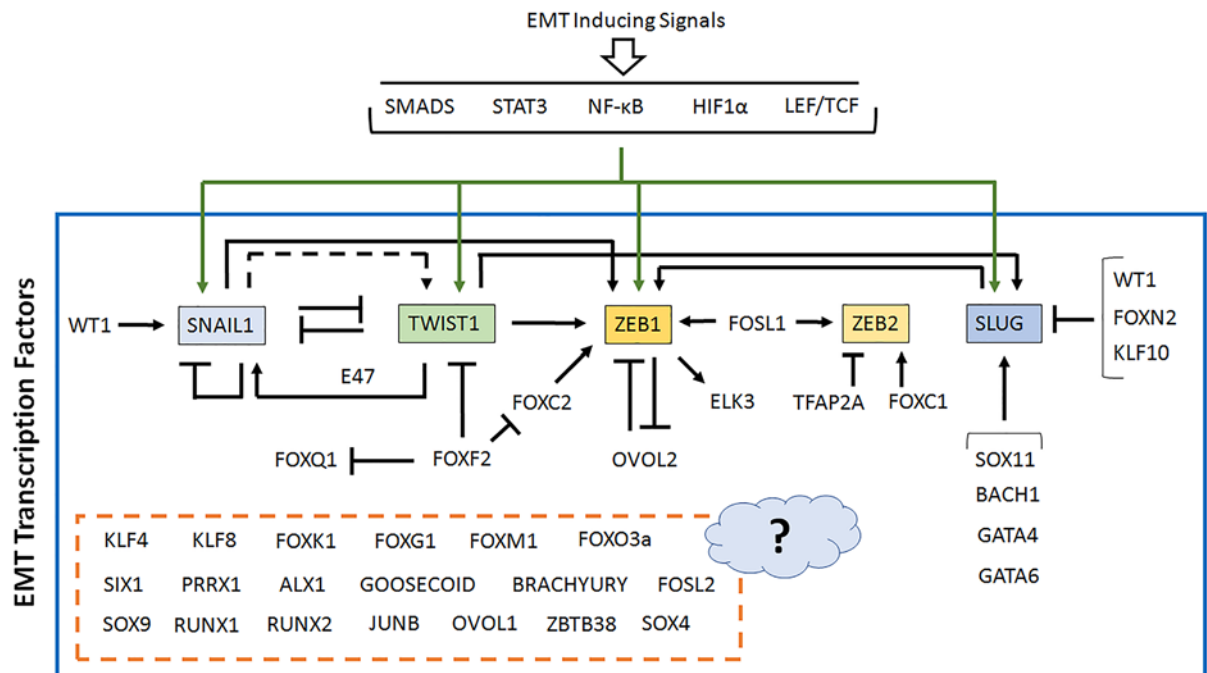

**Figure 4. Transcriptional regulatory network in EMT**

EMT is regulated by many TFs, expression of which are dependent on each other to a large extent, thereby creating a complex transcriptional regulatory network. The master regulators of EMT are shown within colored boxes, while all other EMT TFs are shown as it is. For some EMT TFs, no information regarding their cross-regulation is known, so these are kept within a broken box attached with a question mark. The transcriptional regulatory network is derived from currently available literature (please see text for details) and include all different cell/tissue types as well as different EMT contexts.

than EMT TFs, thereby altering interactome of the EMT TFs. The structural difference between different EMT TF families, and even within the same family members, as depicted in Figure 2, has been found to contribute towards the differential roles of these EMT TFs during EMT, as well. Additionally, all these EMT TFs undergo extensive post-transcriptional and post-translational modifications in a context-dependent manner, which could alter their interaction with specific partners, such as other TFs, co-regulators or epigenetic modifiers, thereby leading to specific outcome for each of these EMT TFs.

Notably, expressions of these EMT TFs were found to be dependent on each other to a large extent (Figure 4). For example, SLUG expression was found to be positively regulated by EMT TFs such as SOX11, GATA4, GATA6 and BACH1, while KLF10, FOXN2 and WT1 was shown to suppress its expression in various cell/tissue types. Furthermore, SNAIL1, FOXC2, and TWIST1 all were found to induce ZEB1 transcription, whereas OVOL2 suppressed it. In fact, ZEB1 and OVOL2 were found to suppress each other's transcription [240]. ZEB2 transcription was shown to be activated by FOXC1, FOSL1 and TFAP2A, while TWIST1 was shown to positively regulate transcription of ZEB1 [105] and SLUG [241]. Interestingly, TWIST1 and SNAIL1 appeared to share a complex relationship during EMT. For example, TWIST1 was shown to suppress SNAIL1 transcription when acted alone but activated SNAIL1 in presence of E47 [242]. SNAIL1 was further shown to directly suppress TWIST1 expression [48,49]. Dave et al., however, reported a positive effect of SNAIL1 on TWIST1 expression [243], although, it is not clear whether it was a direct effect or an indirect one. Some of these EMT TFs were also shown to target and induce expression of their co-transcription factors/binding partners, thereby creating a feed-forward mechanism to facilitate their own function. These types of interdependency in fact suggest presence of transcriptional hierarchy as well as temporal regulation within the transcriptional regulatory network behind EMT. Although, few of these TFs were reported to act alone and regulate transcription of target genes, some of them have also been found to collaborate with each other to regulate target gene expression. Furthermore, the upstream signaling pathways are also known to cross-talk with each other. At this point, it should also be noted that apart from the transcription factors described here, there are also a significant number of other co-transcription factors and/or epigenetic modifying enzymes along with non-coding RNAs including

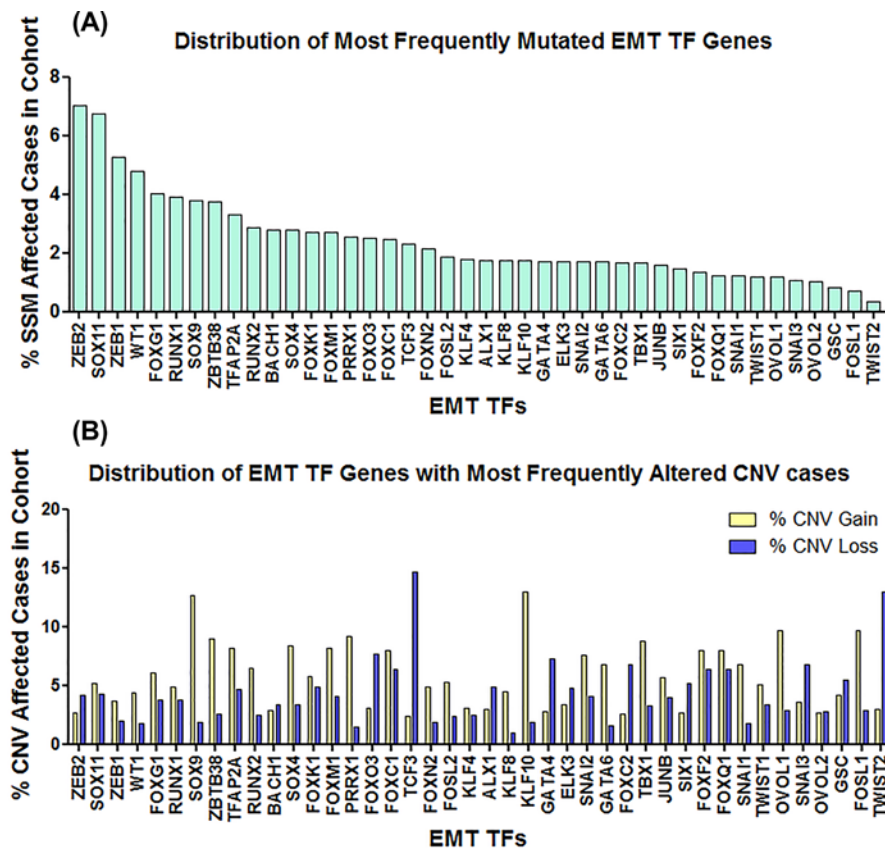

**Figure 5. Genetic alterations of EMT TF genes**

TCGA data were analyzed for the presence of (A) SSMs and (B) CNV within the set of EMT TFs discussed in this review. Our analysis revealed ZEB2, SOX11, and ZEB1 to be the most frequently mutated EMT TFs (SSMs), whereas TCF3, TWIST2, KLF10, and SOX9 to be the EMT TFs with most frequently altered CNV cases.

miRNA, which have been reported to exhibit EMT regulatory functions. Evidently, the transcriptional network regulating EMT has also been found to control expression of these co-transcriptional regulators and the non-coding RNAs during EMT.

All these observations suggest presence of a very complex, dynamic, and flexible transcriptional regulatory mechanism behind the EMT process, which probably functions in a context-dependent manner (EMT type I, II, or III). It also seems very likely that the transcriptional regulatory network controlling the EMT process in various cell/tissue types have both common and distinct elements in them.

## EMT TFs and their significance

Although, the master regulators of EMT such as Snail, Slug, Zeb, Twist have been shown potential as prognostic markers for various cancer types as discussed above, sufficient information regarding mutational status of these molecules are lacking. For that matter, we analyzed the data generated by The Cancer Genome Atlas (TCGA) and looked for presence of simple somatic mutations (SSMs) within the set of EMT TFs discussed in this review. Our analysis revealed that ZEB2 (7.01% of affected cases), SOX11 (6.75% of affected cases), ZEB1 (5.28% of affected cases), WT1 (4.8% of affected cases), and FOXG1 (4.04% of affected cases) are the most frequently mutated EMT TF genes (Figure 5A) in the cohort (data obtained from GDC portal) among our set of EMT TFs. Furthermore, ZEB2 was found to be most frequently mutated in endometrial carcinoma (16.23%); SOX11 in colon adenocarcinoma (28.75%), endometrial carcinoma (19.81%), and esophageal carcinoma (19.02%); ZEB1 in endometrial carcinoma (12.5%) and melanoma (11.1%); WT1 in acute lymphoblastic leukemia (16.1%); and FOXG1 in colon adenocarcinoma (11.25%). Besides, in these cases, all the EMT TFs were found to be mutated in several other cancer types at relatively higher frequency (Table 3). It is also interesting to note that most of the EMT TFs we analyzed, were found to be mutated at a significant frequency in both endometrial carcinoma as well as colon adenocarcinoma (Table 3). Further analysis of

**Table 3 Percentage\* of SSM affected cases in cohort (TCGA)**

| Projects      | Study name                                                       | ZEB2  | SOX11 | ZEB1 | WT1  | FOXG1 | RUNX1 | SOX9 | ZBTB38 | TFAP2A | RUNX2 | BACH1 | SOX4 | FOXK1 | FOXM1 | PRRX1 |
|---------------|------------------------------------------------------------------|-------|-------|------|------|-------|-------|------|--------|--------|-------|-------|------|-------|-------|-------|
| CMI-ASC       | Angiosarcoma Project                                             | 5.56  |       |      | 11.1 |       | 5.56  |      |        |        |       |       |      |       |       |       |
| CMI-MPC       | Metastatic Prostate Cancer                                       |       |       |      | 6.67 |       |       |      |        |        |       |       |      |       |       |       |
| MMRF-COMMPASS | Multiple Myeloma Commpass study                                  |       | 5.32  |      |      |       |       |      |        |        |       |       |      |       |       |       |
| TARGET-ALL-P3 | Acute Lymphoblastic Leukemia Phase 3                             |       |       |      | 16.1 |       | 7.14  |      |        |        |       |       |      |       |       |       |
| TARGET-WT     | High-risk Wilms' tumor                                           |       |       |      | 5.26 |       |       |      |        |        |       |       |      |       |       |       |
| TCGA-ACC      | Adrenocortical carcinoma                                         |       | 7.61  |      |      |       |       |      |        |        |       |       |      |       |       |       |
| TCGA-BLCA     | Bladder Urothelial Carcinoma                                     | 5.1   |       |      |      |       |       |      |        |        |       |       |      |       |       |       |
| TCGA-BRCA     | Breast invasive carcinoma                                        |       |       |      |      |       | 5.07  |      |        |        |       |       |      |       |       |       |
| TCGA-CESC     | Cervical squamous cell carcinoma and endocervical adenocarcinoma | 6.57  | 8.3   |      |      |       |       |      |        |        |       |       |      |       |       |       |
| TCGA-CHOL     | Cholangiocarcinoma                                               |       |       |      |      |       |       |      |        |        |       |       |      |       |       |       |
| TCGA-COAD     | Colon adenocarcinoma                                             | 8.75  | 28.75 | 6.75 | 10.3 | 11.25 |       | 16   |        | 6.25   |       |       | 14.3 | 5.5   |       |       |
| TCGA-DLBC     | Lymphoid Neoplasm Diffuse Large B-cell Lymphoma                  |       | 13.51 |      |      | 5.41  |       |      |        |        |       |       |      |       |       |       |
| TCGA-ESCA     | Esophageal carcinoma                                             | 7.61  | 19.02 |      |      | 5.43  |       |      |        |        | 5.43  |       |      |       |       |       |
| TCGA-KICH     | Kidney Chromophobe                                               |       | 6.06  |      |      |       |       |      |        |        |       |       |      |       |       |       |
| TCGA-LAML     | Acute Myeloid Leukemia                                           |       |       |      | 8.33 |       | 9.72  |      |        |        |       |       |      |       |       |       |
| TCGA-LIHC     | Liver hepatocellular carcinoma                                   |       | 10.16 |      |      |       |       |      |        |        |       |       |      |       |       |       |
| TCGA-LUAD     | Lung Adenocarcinoma                                              | 9.35  |       | 7.94 |      |       |       |      |        |        |       |       |      |       |       |       |
| TCGA-LUSC     | Lung Squamous Cell Carcinoma                                     | 9.9   |       | 8.08 | 5.25 | 5.05  |       |      |        |        |       |       |      |       |       |       |
| TCGA-READ     | Rectum adenocarcinoma                                            | 8.03  | 15.33 | 5.11 |      | 5.11  |       | 7.3  |        |        |       |       |      | 5.11  |       |       |
| TCGA-SARC     | Sarcoma                                                          |       | 7.17  |      |      |       |       |      |        |        |       |       |      |       |       |       |
| TCGA-SKCM     | Skin Cutaneous Melanoma                                          |       |       | 11.1 | 5.76 |       |       |      |        |        |       |       |      |       |       |       |
| TCGA-STAD     | Stomach adenocarcinoma                                           | 8.86  |       | 5.45 |      | 5.91  |       |      | 6.59   |        | 5.23  |       |      |       |       |       |
| TCGA-UCEC     | Uterine Corpus Endometrial Carcinoma                             | 16.23 | 19.81 | 12.5 | 9.81 | 8.87  | 12.08 | 11.1 | 13.02  | 10.57  | 8.3   | 11.51 | 10.8 | 8.3   | 7.55  | 8.11  |

\*We have shown changes only 5% and above.



these EMT TFs for the presence of Copy Number Variations (CNVs) revealed significant changes in copy number for EMT TF genes such as TCF3 (% CNV gain 2.35, % CNV loss 14.7), TWIST2 (% CNV gain 2.97, % CNV loss 12.95), KLF10 (% CNV gain 13.01, % CNV loss 1.85), SOX9 (% CNV gain 12.71, % CNV loss 1.91), FOXQ1 (% CNV gain 8.0, % CNV loss 6.32), FOXF2 (% CNV gain 7.98, % CNV loss 6.33), and FOXC1 (% CNV gain 7.92, % CNV loss 6.33) etc (Figure 5B). Significantly, we have found CNV loss in 58.97% cases of ovarian serous cystadenocarcinoma and 51.97% cases of uterine carcinosarcoma for TCF3; CNV loss in 25.85% cases of cervical squamous cell carcinoma and endocervical adenocarcinoma, 22.31% cases of sarcoma, 21.2% cases of ovarian serous cystadenocarcinoma and 21.08% cases of bladder urothelial carcinoma for TWIST2; CNV gain in 29.74% cases of ovarian serous cystadenocarcinoma, and 20.59% cases of bladder urothelial carcinoma for KLF10; CNV gain in 27.52% cases of ovarian serous cystadenocarcinoma and 20.06% cases of breast invasive carcinoma for SOX9; CNV gain in 26.32% cases of ovarian serous cystadenocarcinoma for FOXQ1 and FOXF2; and CNV gain in 25.81% cases of ovarian serous cystadenocarcinoma for FOXC1 among others (Table 4). One caveat in our analysis using TCGA-derived data is that EMT status of the patient tissue samples are unknown. Nevertheless, the single somatic mutation and copy number variation analysis in this article clearly signifies the importance of these EMT TFs during the development and progression of cancer in specific cell/tissue types. Significantly, besides facilitating the metastatic dissemination of cancer cells, EMT has also been observed during early stages of tumorigenesis [244,245], therefore suggesting a wider role for these EMT TFs during cancer development.

## EMT inhibitors as potential anti-cancer/anti-fibrosis drugs

From the above discussion, it is quite evident that EMT is involved during various stages of carcinogenesis and is responsible for acquisition of different characteristics such as stem cell properties, chemoresistance, as well as resistance to immunotherapy by the cancer cells. Therefore, inhibiting the EMT process, in theory, is not only going to inhibit cancer cell dissemination and therefore inhibit metastasis, but it will also make the cancer cells more sensitive towards various forms of therapy. The strategies that are being used to target the EMT process involve: (a) Targeting extracellular inducers and signaling pathways of EMT, (b) Targeting EMT TFs and associated cofactors as well as epigenetic modifiers, (c) Using metabolic pathway inhibitors to block EMT, and (d) Targeting the mesenchymal cell-specific molecules (Figure 6) [246–248]. Many small molecules including derivatives of natural products as well as already approved drugs (being used for other purposes) have been shown to suppress EMT by targeting various mediators/pathways as per the above strategies. Significantly, these EMT inhibitors exhibited both anti-cancer and anti-fibrosis activity in multiple tissue types, suggesting they may be effective for both cancer patients and patients with fibrotic tissue.

It should be noted that although, these EMT inhibitors have shown great potential as anti-cancer/anti-fibrosis drug, several concerns still exist regarding their use in patients. In general, within a tumor at the primary site, only a very small number of tumor cells undergo EMT. This might increase the chance for these tumor cells undergoing EMT to escape the drug. Furthermore, cells are known to undergo transient and incomplete EMT process, thereby creating a spectrum of hybrid epithelial/mesenchymal states with great functional flexibility, which makes it difficult to target these cells. EMT was also shown to occur even during early tumorigenesis process. This early dissemination of tumor cells may lead to presence of tumor cells in circulation as well as at the secondary sites. Use of EMT inhibitors might induce the reverse process, MET, in these cells, and therefore could facilitate colonization at the secondary site. Inhibition of EMT in these cells might also increase their proliferation, which in turn could lead to rapid tumor growth in both primary and secondary sites. Although, this would make the target tumor cells vulnerable to common chemotherapeutic drugs targeting rapidly dividing tumor cells. Significantly, the key players involved in EMT, such as the inducers, signaling pathways, even the EMT TFs are also known to be involved in other processes such as normal stem cell functioning, immune response etc. Furthermore, EMT is also known to facilitate the wound healing process. Consequently, EMT inhibitor therapy might elicit serious side effects in patients. Taken together, it is clear that a better understanding of the EMT process, especially the hybrid state, as well as more preclinical data regarding response to potential EMT inhibitors are required to develop a workable therapeutic strategy.

## Conclusion and perspectives

Work from various laboratories have been able to identify a large group of TFs regulating EMT in various cell/tissue types as well as in different contexts. We are only beginning to understand how all these transcription factors as well as other co-transcriptional regulators and non-coding RNAs act together to form a dynamic regulatory network in a context-dependent manner to control the transition. Evidently, controlled expression of pro- and anti-EMT TFs, or even certain EMT TFs alone, seems to have the potential to create an epithelial–mesenchymal hybrid state with

**Table 4 Percentage\* of CNV affected cases in cohort (TCGA)**

| Project   | Study name                                                       | TCF3  |        | TWIST2 |        | KLF10 |        | SOX9  |        | FOXQ1 |        | FOXF2 |        | FOXC1 |        |
|-----------|------------------------------------------------------------------|-------|--------|--------|--------|-------|--------|-------|--------|-------|--------|-------|--------|-------|--------|
|           |                                                                  | Gains | Losses | Gains  | Losses | Gains | Losses | Gains | Losses | Gains | Losses | Gains | Losses | Gains | Losses |
| TCGA-BLCA | Bladder Urothelial Carcinoma                                     |       |        | 1.23   | 21.08  | 20.59 | 0.49   | 12.75 | 0.74   |       |        |       |        |       |        |
| TCGA-BRCA | Breast invasive carcinoma                                        | 1.68  | 14.74  |        |        | 18.66 | 1.12   | 20.06 | 2.05   |       |        |       |        |       |        |
| TCGA-CESC | Cervical squamous cell carcinoma and endocervical adenocarcinoma | 2.72  | 14.97  | 0.68   | 25.85  |       |        |       |        |       |        |       |        |       |        |
| TCGA-CHOL | Cholangiocarcinoma                                               |       |        |        |        | 16.67 | 0      |       |        |       |        |       |        |       |        |
| TCGA-ESCA | Esophageal carcinoma                                             | 1.09  | 13.04  | 2.17   | 15.22  | 15.22 | 2.17   | 13.59 | 4.89   | 8.15  | 16.3   | 7.61  | 16.3   | 7.61  | 16.3   |
| TCGA-HNSC | Head and Neck squamous cell carcinoma                            | 0.77  | 11.13  | 1.34   | 17.47  |       |        |       |        |       |        |       |        |       |        |
| TCGA-LIHC | Liver hepatocellular carcinoma                                   |       |        |        |        | 13.75 | 0.27   |       |        |       |        |       |        |       |        |
| TCGA-LUAD | Lung Adenocarcinoma                                              |       |        |        |        | 11.89 | 2.14   | 10.53 | 0.78   |       |        |       |        |       |        |
| TCGA-LUSC | Lung Squamous Cell Carcinoma                                     | 1.99  | 11.75  | 1.79   | 19.12  | 14.94 | 1.59   | 15.14 | 1.39   |       |        |       |        |       |        |
| TCGA-OV   | Ovarian serous cystadenocarcinoma                                | 1.37  | 58.97  | 11.28  | 21.2   | 29.74 | 5.98   | 27.52 | 1.71   | 26.32 | 12.14  | 26.32 | 12.31  | 25.81 | 12.14  |
| TCGA-SARC | Sarcoma                                                          | 10    | 15     | 4.23   | 22.31  |       |        | 12.31 | 2.69   |       |        |       |        |       |        |
| TCGA-SKCM | Skin Cutaneous Melanoma                                          |       |        |        |        |       |        | 11.97 | 1.28   | 11.11 | 1.5    | 11.11 | 1.5    | 10.9  | 1.07   |
| TCGA-UCEC | Uterine Corpus Endometrial Carcinoma                             | 0.2   | 18.43  |        |        |       |        |       |        |       |        |       |        |       |        |
| TCGA-UCS  | Uterine Carcinosarcoma                                           | 1.79  | 51.79  |        |        | 16.07 | 0      | 19.64 | 0      | 8.93  | 10.71  |       |        | 8.93  | 10.71  |
| TCGA-UVM  | Uveal Melanoma                                                   |       |        |        |        | 15.19 | 0      |       |        |       |        | 8.93  | 10.71  |       |        |

\*We have shown changes of only 10% and above in either of a pair of Gain or Loss.

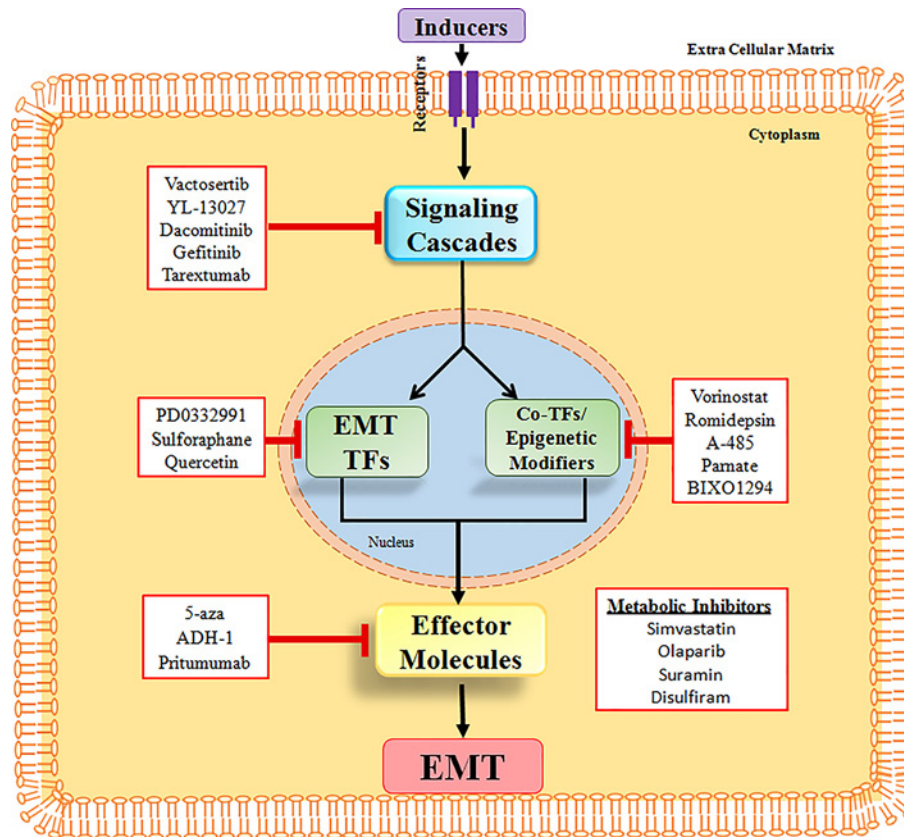

**Figure 6. The EMT inhibitors and their targets**

Small molecule inhibitors are being used to suppress the EMT process. They target various key components of EMT, including the EMT TFs.

maximum plasticity, thereby keeping the cell in an optimal state, so that it can initiate its movement from the primary location. Notably, most of these EMT transcription factors were studied in isolation in a cell/tissue type-specific manner (Tables 1 and 2). Consequently, we still do not have enough information regarding the relationships/cross-talks that exist among them in different cell/tissue types or even within the same cellular context. As a result, when we talk about the transcriptional regulatory network responsible for EMT, we currently have fragments of information coming from different sources. Furthermore, for a number of these EMT TFs, we still do not know anything about their direct targets (Table 2). Consequently, a far more in-depth study of EMT in a cell/tissue type as well as context-dependent manner is needed to have a better understanding of the process.

### Competing Interests

The authors declare that there are no competing interests associated with the manuscript.

### Funding

This work was supported by the Early Career Research Award from DST-SERB [grant number ECR/2016/000207 (to S.P.C.)].

### Acknowledgements

S.P.C. would like to dedicate this article to the memory of Late Mr Srinjoy Sengupta, who was instrumental in starting the research work at the lab. We gratefully acknowledge the infrastructural support provided by Amity University Kolkata. We are also very much thankful to Dr Sandipan Chakraborty, Amity Institute of Biotechnology, Amity University Kolkata for helping with the referencing of the article. The mutational analysis shown here is in whole based upon data generated by the TCGA Research Network: <https://www.cancer.gov/tcga>.

## Abbreviations

bHLH, basic-helix-loop-helix; CtBP, C-terminal-binding protein; DNMT, DNA Methyl Transferase; EMT, epithelial-mesenchymal transition; HCC, hepatocellular carcinoma; HDAC, histone deacetylase; KLF4, Krüppel-like factor 4; MET, mesenchymal-epithelial transition; NSCLC, non-small cell lung cancer; PRC, Polycomb Repressive Complex; PRRX1, paired-related homeobox 1; SOX, SRY-related HMG-box; TCGA, The Cancer Genome Atlas; TF, transcription factor; WT1, Wilms' tumor 1; Zeb, zinc finger E-box binding.

## References

- Lee, J.M., Dedhar, S., Kalluri, R. and Thompson, E.W. (2006) The epithelial-mesenchymal transition: new insights in signaling, development, and disease. *J. Cell Biol.* **172**, 973–981, <https://doi.org/10.1083/jcb.200601018>
- Yang, J. and Weinberg, R.A. (2008) Epithelial-mesenchymal transition: at the crossroads of development and tumor metastasis. *Dev. Cell* **14**, 818–829, <https://www.sciencedirect.com/science/article/pii/S1534580708002098>, <https://doi.org/10.1016/j.devcel.2008.05.009>
- Kalluri, R. and Weinberg, R.A. (2009) The basics of epithelial-mesenchymal transition. *J. Clin. Invest.* **119**, 1420–1428, <https://doi.org/10.1172/JCI39104>
- Thiery, J.P., Acloque, H., Huang, R.Y.J. and Nieto, M.A. (2009) Epithelial-mesenchymal transitions in development and disease. *Cell* **139**, 871–890, <https://www.sciencedirect.com/science/article/pii/S0092867409014196>, <https://doi.org/10.1016/j.cell.2009.11.007>
- Lamouille, S., Xu, J. and Derynck, R. (2014) Molecular mechanisms of epithelial-mesenchymal transition. *Nat. Rev. Mol. Cell Biol.* **15**, 178–196, <https://doi.org/10.1038/nrm3758>
- Kim, D.H., Xing, T., Yang, Z., Dudek, R., Lu, Q. and Chen, Y.-H. (2018) Epithelial mesenchymal transition in embryonic development, tissue repair and cancer: a comprehensive overview. *J. Clin. Med.* **7**, 1, <https://doi.org/10.3390/jcm7010001>
- Francou, A. and Anderson, K.V. (2020) The epithelial-to-mesenchymal transition in development and cancer. *Annu. Rev. Cancer Biol.* **4**, 197–220, <https://doi.org/10.1146/annurev-cancerbio-030518-055425>
- Gammill, L.S. and Bronner-Fraser, M. (2003) Neural crest specification: migrating into genomics. *Nat. Rev. Neurosci.* **4**, 795–805, <https://doi.org/10.1038/nrn1219>
- Steventon, B., Carmona-Fontaine, C. and Mayor, R. (2005) Genetic network during neural crest induction: from cell specification to cell survival. *Semin. Cell Dev. Biol.* **16**, 647–654, <https://www.sciencedirect.com/science/article/pii/S1084952105000819>, <https://doi.org/10.1016/j.semcdb.2005.06.001>
- Nikitina, N., Sauka-Spengler, T. and Bronner-Fraser, M. (2008) Dissecting early regulatory relationships in the lamprey neural crest gene network. *Proc. Natl. Acad. Sci. U.S.A.* **105**, 20083LP–20088LP, <http://www.pnas.org/content/105/51/20083.abstract>, <https://doi.org/10.1073/pnas.0806009105>
- Weston, J.A. and Thiery, J.P. (2015) Pentimento: Neural Crest and the origin of mesectoderm. *Dev. Biol.* **401**, 37–61, <https://www.sciencedirect.com/science/article/pii/S0012160615000056>, <https://doi.org/10.1016/j.ydbio.2014.12.035>
- Sisto, M., Ribatti, D. and Lisi, S. (2021) Organ fibrosis and autoimmunity: the role of inflammation in TGFβ-dependent EMT. *Biomolecules* **11**, 310, <https://doi.org/10.3390/biom11020310>
- Boulay, J.L., Dennefeld, C. and Alberga, A. (1987) The *Drosophila* developmental gene *snail* encodes a protein with nucleic acid binding fingers. *Nature* **330**, 395–398, <https://doi.org/10.1038/330395a0>
- Alberga, A., Boulay, J.L., Kempe, E., Dennefeld, C. and Haenlin, M. (1991) The *snail* gene required for mesoderm formation in *Drosophila* is expressed dynamically in derivatives of all three germ layers. *Development* **111**, 983–992, <https://doi.org/10.1242/dev.111.4.983>
- Carver, E.A., Rulang, J., Lan, Y., Oram, K.F. and Thomas, G. (2001) The mouse *snail* gene encodes a key regulator of the epithelial-mesenchymal transition. *Mol. Cell. Biol.* **21**, 8184–8188, <https://doi.org/10.1128/MCB.21.23.8184-8188.2001>
- Jiang, R., Lan, Y., Norton, C.R., Sundberg, J.P. and Gridley, T. (1998) The *slug* gene is not essential for mesoderm or neural crest development in mice. *Dev. Biol.* **198**, 277–285, <https://www.sciencedirect.com/science/article/pii/S0012160698800055>, [https://doi.org/10.1016/S0012-1606\(98\)80005-5](https://doi.org/10.1016/S0012-1606(98)80005-5)
- Nieto, M.A., Sargent, M.G., Wilkinson, D.G. and Cooke, J. (1994) Control of cell behavior during vertebrate development by *Slug*, a zinc finger gene. *Science (80-)* **264**, 835LP–839LP, <http://science.sciencemag.org/content/264/5160/835.abstract>, <https://doi.org/10.1126/science.7513443>
- Boutet, A., De Frutos, C.A., Maxwell, P.H., Mayol, M.J., Romero, J. and Nieto, M.A. (2006) *Snail* activation disrupts tissue homeostasis and induces fibrosis in the adult kidney. *EMBO J.* **25**, 5603–5613, <https://doi.org/10.1038/sj.emboj.7601421>
- Arnoux, V., Nassour, M., L'Helgoualc'h, A., Hipskind, R.A. and Savagner, P. (2008) *Erk5* controls *slug* expression and keratinocyte activation during wound healing. *Mol. Biol. Cell* **19**, 4738–4749, <https://doi.org/10.1091/mbc.e07-10-1078>
- Blanco, M.J., Moreno-Bueno, G., Sarrio, D., Locascio, A., Cano, A., Palacios, J. et al. (2002) Correlation of *Snail* expression with histological grade and lymph node status in breast carcinomas. *Oncogene* **21**, 3241–3246, <https://doi.org/10.1038/sj.onc.1205416>
- Rosivatz, E., Becker, I., Specht, K., Fricke, E., Lubber, B., Busch, R. et al. (2002) Differential expression of the epithelial-mesenchymal transition regulators *Snail*, *SIP1*, and *twist* in gastric cancer. *Am. J. Pathol.* **161**, 1881–1891, <https://www.sciencedirect.com/science/article/pii/S0002944010644641>, [https://doi.org/10.1016/S0002-9440\(10\)64464-1](https://doi.org/10.1016/S0002-9440(10)64464-1)
- Sugimachi, K., Tanaka, S., Kameyama, T., Taguchi, K., Aishima, S., Shimada, M. et al. (2003) Transcriptional repressor *snail* and progression of human hepatocellular carcinoma. *Clin. Cancer Res.* **9**, 2657LP–2664LP, <http://clincancerres.aacrjournals.org/content/9/7/2657.abstract>
- Miyoshi, A., Kitajima, Y., Kido, S., Shimonishi, T., Matsuyama, S., Kitahara, K. et al. (2005) *Snail* accelerates cancer invasion by upregulating MMP expression and is associated with poor prognosis of hepatocellular carcinoma. *Br. J. Cancer* **92**, 252–258, <https://doi.org/10.1038/sj.bjc.6602266>
- Pálmer, H.G., Larriba, M.J., García, J.M., Ordóñez-Morán, P., Peña, C., Peiró, S. et al. (2004) The transcription factor *SNAIL* represses vitamin D receptor expression and responsiveness in human colon cancer. *Nat. Med.* **10**, 917–919, <https://doi.org/10.1038/nm1095>



- 25 Martin, T.A., Goyal, A., Watkins, G. and Jiang, W.G. (2005) Expression of the transcription factors Snail, Slug, and Twist and their clinical significance in human breast cancer. *Ann. Surg. Oncol.* **12**, 488–496, <https://doi.org/10.1245/ASO.2005.04.010>
- 26 Elloul, S., Bukholt Elstrand, M., Nesland, J.M., Tropé, C.G., Kvalheim, G., Goldberg, I. et al. (2005) Snail, Slug, and Smad-interacting protein 1 as novel parameters of disease aggressiveness in metastatic ovarian and breast carcinoma. *Cancer* **103**, 1631–1643, <https://doi.org/10.1002/cncr.20946>
- 27 Saito, T., Oda, Y., Kawaguchi, K., Sugimachi, K., Yamamoto, H., Tateishi, N. et al. (2004) E-cadherin mutation and Snail overexpression as alternative mechanisms of E-cadherin inactivation in synovial sarcoma. *Oncogene* **23**, 8629–8638, <https://doi.org/10.1038/sj.onc.1207960>
- 28 Olmeda, D., Jordá, M., Peinado, H., Fabra, Á. and Cano, A. (2007) Snail silencing effectively suppresses tumour growth and invasiveness. *Oncogene* **26**, 1862–1874, <https://doi.org/10.1038/sj.onc.1209997>
- 29 Yang, X., Han, M., Han, H., Wang, B., Li, S., Zhang, Z. et al. (2017) Silencing Snail suppresses tumor cell proliferation and invasion by reversing epithelial-to-mesenchymal transition and arresting G2/M phase in non-small cell lung cancer. *Int. J. Oncol.* **50**, 1251–1260, <https://doi.org/10.3892/ijo.2017.3888>
- 30 Hojo, N., Huisken, A.L., Wang, H., Chirshv, E., Kim, N.S., Nguyen, S.M. et al. (2018) Snail knockdown reverses stemness and inhibits tumour growth in ovarian cancer. *Sci. Rep.* **8**, 8704, <https://doi.org/10.1038/s41598-018-27021-z>
- 31 Cano, A., Pérez-Moreno, M.A., Rodrigo, I., Locascio, A., Blanco, M.J., del Barrio, M.G. et al. (2000) The transcription factor Snail controls epithelial-mesenchymal transitions by repressing E-cadherin expression. *Nat. Cell Biol.* **2**, 76–83, <https://doi.org/10.1038/35000025>
- 32 Guaita, S., Puig, I., Francí, C., Garrido, M., Domínguez, D., Battle, E. et al. (2002) Snail induction of epithelial to mesenchymal transition in tumor cells is accompanied by *MUC1* repression and *ZEB1* expression\*. *J. Biol. Chem.* **277**, 39209–39216, <https://doi.org/10.1074/jbc.M206400200>
- 33 Qiao, B., Johnson, W.N. and Gao, J. (2010) Epithelial-mesenchymal transition in oral squamous cell carcinoma triggered by transforming growth factor- $\beta$  1 is Snail family-dependent and correlates with matrix metalloproteinase-2 and -9 expressions. *Int. J. Oncol.* **37**, 663–668
- 34 Javaid, S., Zhang, J., Anderssen, E., Black, J.C., Wittner, B.S., Tajima, K. et al. (2013) Dynamic chromatin modification sustains epithelial-mesenchymal transition following inducible expression of Snail-1. *Cell Rep.* **5**, 1679–1689, <https://www.sciencedirect.com/science/article/pii/S2211124713007183>, <https://doi.org/10.1016/j.celrep.2013.11.034>
- 35 Masui, T., Ota, I., Yook, J.-I., Mikami, S., Yane, K., Yamanaka, T. et al. (2014) Snail-induced epithelial-mesenchymal transition promotes cancer stem cell-like phenotype in head and neck cancer cells. *Int. J. Oncol.* **44**, 693–699, <https://doi.org/10.3892/ijo.2013.2225>
- 36 Smith, B.N., Burton, L.J., Henderson, V., Randle, D.D., Morton, D.J., Smith, B.A. et al. (2014) Snail promotes epithelial mesenchymal transition in breast cancer cells in part via activation of nuclear ERK2. *PLoS ONE* **9**, e104987, <https://doi.org/10.1371/journal.pone.0104987>
- 37 de Souza Palma, C., Grassi, M.L., Thomé, C.H., Ferreira, G.A., Albuquerque, D. et al. (2016) Proteomic analysis of epithelial to mesenchymal transition (EMT) reveals cross-talk between SNAIL and HDAC1 proteins in breast cancer cells\*. *Mol. Cell. Proteomics* **15**, 906–917, <https://www.sciencedirect.com/science/article/pii/S1535947620336501>, <https://doi.org/10.1074/mcp.M115.052910>
- 38 Ota, I., Masui, T., Kurihara, M., Yook, J.-I., Mikami, S., Kimura, T. et al. (2016) Snail-induced EMT promotes cancer stem cell-like properties in head and neck cancer cells. *Oncol. Rep.* **35**, 261–266, <https://doi.org/10.3892/or.2015.4348>
- 39 Wang, H., Wang, Z., Li, Y., Lu, T. and Hu, G. (2020) Silencing Snail reverses epithelial-mesenchymal transition and increases radiosensitivity in hypopharyngeal carcinoma. *Onco Targets Ther.* **13**, 497–511, <https://doi.org/10.2147/OTT.S237410>
- 40 Battle, E., Sancho, E., Francí, C., Domínguez, D., Monfar, M., Baulida, J. et al. (2000) The transcription factor Snail is a repressor of E-cadherin gene expression in epithelial tumour cells. *Nat. Cell Biol.* **2**, 84–89, <https://doi.org/10.1038/35000034>
- 41 Dong, C., Wu, Y., Yao, J., Wang, Y., Yu, Y., Rychahou, P.G. et al. (2012) G9a interacts with Snail and is critical for Snail-mediated E-cadherin repression in human breast cancer. *J. Clin. Invest.* **122**, 1469–1486, <https://doi.org/10.1172/JCI57349>
- 42 Villarejo, A., Cortés-Cabrera, Á., Molina-Ortiz, P., Portillo, F. and Cano, A. (2014) Differential role of Snail1 and Snail2 zinc fingers in E-cadherin repression and epithelial to mesenchymal transition\*. *J. Biol. Chem.* **289**, 930–941, <https://doi.org/10.1074/jbc.M113.528026>
- 43 Peiró, S., Escrivà, M., Puig, I., Barberà, M.J., Dave, N., Herranz, N. et al. (2006) Snail1 transcriptional repressor binds to its own promoter and controls its expression. *Nucleic Acids Res.* **34**, 2077–2084, <https://doi.org/10.1093/nar/gk1141>
- 44 Martínez-Estrada, O.M., Cullerés, A., Soriano, F.X., Peinado, H., Bolós, V., Martínez, F.O. et al. (2006) The transcription factors Slug and Snail act as repressors of Claudin-1 expression in epithelial cells1. *Biochem. J.* **394**, 449–457, <https://doi.org/10.1042/BJ20050591>
- 45 Ikenouchi, J., Matsuda, M., Furuse, M. and Tsukita, S. (2003) Regulation of tight junctions during the epithelium-mesenchyme transition: direct repression of the gene expression of claudins/occludin by Snail. *J. Cell Sci.* **116**, 1959–1967, <https://doi.org/10.1242/jcs.00389>
- 46 Wu, W.-S., You, R.-I., Cheng, C.-C., Lee, M.-C., Lin, T.-Y. and Hu, C.-T. (2017) Snail collaborates with EGR-1 and SP-1 to directly activate transcription of MMP 9 and ZEB1. *Sci. Rep.* **7**, 17753, <https://doi.org/10.1038/s41598-017-18101-7>
- 47 Stanisavljevic, J., Porta-de-la-Riva, M., Battle, R., de Herreros, A.G. and Baulida, J. (2011) The p65 subunit of NF- $\kappa$ B and PARP1 assist Snail1 in activating fibronectin transcription. *J. Cell Sci.* **124**, 4161–4171, <https://doi.org/10.1242/jcs.078824>
- 48 Tran, D.D., Corsa, C.A.S., Biswas, H., Aft, R.L. and Longmore, G.D. (2011) Temporal and spatial cooperation of Snail1 and Twist1 during epithelial-mesenchymal transition predicts for human breast cancer recurrence. *Mol. Cancer Res.* **9**, 1644LP–1657LP, <http://mcr.aacrjournals.org/content/9/12/1644.abstract>, <https://doi.org/10.1158/1541-7786.MCR-11-0371>
- 49 Forghanifard, M.M., Ardalan Khaless, S., Farshchian, M., Rad, A., Homayouni-Tabrizi, M. and Abbaszadegan, M.R. (2017) Negative regulatory role of TWIST1 on SNAIL gene expression. *Pathol. Oncol. Res.* **23**, 85–90, <https://doi.org/10.1007/s12253-016-0093-2>
- 50 Sundararajan, V., Tan, M., Tan, T.Z., Ye, J., Thiery, J.P. and Huang, R.Y.-J. (2019) SNAIL1 recruits HDAC1 to suppress SNAIL2 transcription during epithelial to mesenchymal transition. *Sci. Rep.* **9**, 8295, <https://doi.org/10.1038/s41598-019-44826-8>
- 51 Hajra, K.M., Chen, D.Y.-S. and Fearon, E.R. (2002) The SLUG zinc-finger protein represses E-Cadherin in breast cancer. *Cancer Res.* **62**, 1613LP–1618LP, <http://cancerres.aacrjournals.org/content/62/6/1613.abstract>

- 52 Bolós, V., Peinado, H., Perez-Moreno, M.A., Fraga, M.F., Esteller, M. and Cano, A. (2003) The transcription factor Slug represses E-cadherin expression and induces epithelial to mesenchymal transitions: a comparison with Snail and E47 repressors. *J. Cell Sci.* **116**, 499–511, <https://doi.org/10.1242/jcs.00224>
- 53 Wels, C., Joshi, S., Koefinger, P., Bergler, H. and Schaidler, H. (2011) Transcriptional activation of ZEB1 by Slug leads to cooperative regulation of the epithelial-mesenchymal transition-like phenotype in melanoma. *J. Invest. Dermatol.* **131**, 1877–1885, <https://www.sciencedirect.com/science/article/pii/S0022202X15354075>, <https://doi.org/10.1038/jid.2011.142>
- 54 Nieto, M.A. (2002) The snail superfamily of zinc-finger transcription factors. *Nat. Rev. Mol. Cell Biol.* **3**, 155–166, <https://doi.org/10.1038/nrm757>
- 55 Chiang, C. and Ayyanathan, K. (2013) Snail/Gfi-1 (SNAG) family zinc finger proteins in transcription regulation, chromatin dynamics, cell signaling, development, and disease. *Cytokine Growth Factor Rev.* **24**, 123–131, <https://www.sciencedirect.com/science/article/pii/S1359610112000767>, <https://doi.org/10.1016/j.cytogfr.2012.09.002>
- 56 Hsu, D.S.-S., Wang, H.-J., Tai, S.-K., Chou, C.-H., Hsieh, C.-H., Chiu, P.-H. et al. (2014) Acetylation of Snail modulates the cytokinome of cancer cells to enhance the recruitment of macrophages. *Cancer Cell* **26**, 534–548, <https://www.sciencedirect.com/science/article/pii/S1535610814003651>, <https://doi.org/10.1016/j.ccell.2014.09.002>
- 57 Funahashi, J., Sekido, R., Murai, K., Kamachi, Y. and Kondoh, H. (1993) Delta-crystallin enhancer binding protein delta EF1 is a zinc finger-homeodomain protein implicated in postgastrulation embryogenesis. *Development* **119**, 433–446, <https://doi.org/10.1242/dev.119.2.433>
- 58 Takagi, T., Moribe, H., Kondoh, H. and Higashi, Y. (1998) DeltaEF1, a zinc finger and homeodomain transcription factor, is required for skeleton patterning in multiple lineages. *Development* **125**, 21–31, <https://doi.org/10.1242/dev.125.1.21>
- 59 Sheng, G., dos Reis, M. and Stern, C.D. (2003) Churchill, a zinc finger transcriptional activator, regulates the transition between gastrulation and neurulation. *Cell* **115**, 603–613, <https://www.sciencedirect.com/science/article/pii/S0092867403009279>, [https://doi.org/10.1016/S0092-8674\(03\)00927-9](https://doi.org/10.1016/S0092-8674(03)00927-9)
- 60 Papin, C., van Grunsven, L.A., Verschuere, K., Huylebroeck, D. and Smith, J.C. (2002) Dynamic regulation of Brachyury expression in the amphibian embryo by XSIP1. *Mech. Dev.* **111**, 37–46, <https://www.sciencedirect.com/science/article/pii/S0925477301005998>, [https://doi.org/10.1016/S0925-4773\(01\)00599-8](https://doi.org/10.1016/S0925-4773(01)00599-8)
- 61 Van de Putte, T., Maruhashi, M., Francis, A., Nelles, L., Kondoh, H., Huylebroeck, D. et al. (2003) Mice lacking Zfhx1b, the gene that codes for Smad-interacting protein-1, reveal a role for multiple neural crest cell defects in the etiology of hirschsprung disease-mental retardation syndrome. *Am. J. Hum. Genet.* **72**, 465–470, <https://www.sciencedirect.com/science/article/pii/S0002929707605552>, <https://doi.org/10.1086/346092>
- 62 He, L., Yu, K., Lu, F., Wang, J., Wu, L.N., Zhao, C. et al. (2018) Transcriptional regulator ZEB2 is essential for Bergmann glia development. *J. Neurosci.* **38**, 1575LP–1587LP, <http://www.jneurosci.org/content/38/6/1575.abstract>, <https://doi.org/10.1523/JNEUROSCI.2674-17.2018>
- 63 Zhang, G.-J., Zhou, T., Tian, H.-P., Liu, Z.-L. and Xia, S.-S. (2013) High expression of ZEB1 correlates with liver metastasis and poor prognosis in colorectal cancer. *Oncol. Lett.* **5**, 564–568, <https://doi.org/10.3892/ol.2012.1026>
- 64 Prislei, S., Martinelli, E., Zannoni, G.F., Petrillo, M., Filippetti, F., Mariani, M. et al. (2015) Role and prognostic significance of the epithelial-mesenchymal transition factor ZEB2 in ovarian cancer. *Oncotarget* **6**, 18966–18979, <https://doi.org/10.18632/oncotarget.3943>
- 65 Jang, M.H., Kim, H.J., Kim, E.J., Chung, Y.R. and Park, S.Y. (2015) Expression of epithelial-mesenchymal transition-related markers in triple-negative breast cancer: ZEB1 as a potential biomarker for poor clinical outcome. *Hum. Pathol.* **46**, 1267–1274, <https://www.sciencedirect.com/science/article/pii/S0046817715001847>, <https://doi.org/10.1016/j.humpath.2015.05.010>
- 66 Chen, H., Lu, W., Huang, C., Ding, K., Xia, D., Wu, Y. et al. (2017) Prognostic significance of ZEB1 and ZEB2 in digestive cancers: a cohort-based analysis and secondary analysis. *Oncotarget* **8**, 31435–31448, <https://doi.org/10.18632/oncotarget.15634>
- 67 Li, M.-Z., Wang, J.-J., Yang, S.-B., Li, W.-F., Xiao, L.-B., He, Y.-L. et al. (2017) ZEB2 promotes tumor metastasis and correlates with poor prognosis of human colorectal cancer. *Am. J. Transl. Res.* **9**, 2838–2851
- 68 Eger, A., Aigner, K., Sonderegger, S., Dampier, B., Oehler, S., Schreiber, M. et al. (2005) DeltaEF1 is a transcriptional repressor of E-cadherin and regulates epithelial plasticity in breast cancer cells. *Oncogene* **24**, 2375–2385, <https://doi.org/10.1038/sj.onc.1208429>
- 69 Vandewalle, C., Comijn, J., De Craene, B., Vermassen, P., Bruyneel, E., Andersen, H. et al. (2005) SIP1/ZEB2 induces EMT by repressing genes of different epithelial cell-cell junctions. *Nucleic Acids Res.* **33**, 6566–6578, <https://doi.org/10.1093/nar/gki965>
- 70 Lindner, P., Paul, S., Eckstein, M., Hampel, C., Muenzner, J.K., Erlenbach-Wuensch, K. et al. (2020) EMT transcription factor ZEB1 alters the epigenetic landscape of colorectal cancer cells. *Cell Death Dis.* **11**, 147, <https://doi.org/10.1038/s41419-020-2340-4>
- 71 Aigner, K., Dampier, B., Descovich, L., Mikula, M., Sultan, A., Schreiber, M. et al. (2007) The transcription factor ZEB1 ( $\delta$ EF1) promotes tumour cell dedifferentiation by repressing master regulators of epithelial polarity. *Oncogene* **26**, 6979–6988, <https://doi.org/10.1038/sj.onc.1210508>
- 72 Aigner, K., Descovich, L., Mikula, M., Sultan, A., Dampier, B., Bonn e, S. et al. (2007) The transcription factor ZEB1 ( $\delta$ EF1) represses Plakophilin 3 during human cancer progression. *FEBS Lett.* **581**, 1617–1624, <https://www.sciencedirect.com/science/article/pii/S0014579307002864>, <https://doi.org/10.1016/j.febslet.2007.03.026>
- 73 S anchez-Till o, E., L azaro, A., Torrent, R., Cuatrecasas, M., Vaquero, E.C., Castells, A. et al. (2010) ZEB1 represses E-cadherin and induces an EMT by recruiting the SWI/SNF chromatin-remodeling protein BRG1. *Oncogene* **29**, 3490–3500, <https://doi.org/10.1038/nc.2010.102>
- 74 Larsen, J.E., Nathan, V., Osborne, J.K., Farrow, R.K., Deb, D., Sullivan, J.P. et al. (2016) ZEB1 drives epithelial-to-mesenchymal transition in lung cancer. *J. Clin. Invest.* **126**, 3219–3235, <https://doi.org/10.1172/JCI76725>
- 75 Krebs, A.M., Mitschke, J., Laserra Losada, M., Schmalhofer, O., Boerries, M., Busch, H. et al. (2017) The EMT-activator Zeb1 is a key factor for cell plasticity and promotes metastasis in pancreatic cancer. *Nat. Cell Biol.* **19**, 518–529, <https://doi.org/10.1038/ncb3513>
- 76 Skrypek, N., Bruneel, K., Vandewalle, C., De Smedt, E., Soen, B., Loret, N. et al. (2018) ZEB2 stably represses RAB25 expression through epigenetic regulation by SIRT1 and DNMTs during epithelial-to-mesenchymal transition. *Epigenetics Chromatin* **11**, 70, <https://doi.org/10.1186/s13072-018-0239-4>

- 77 Yoshimoto, S., Tanaka, F., Morita, H., Hiraki, A. and Hashimoto, S. (2019) Hypoxia-induced HIF-1 $\alpha$  and ZEB1 are critical for the malignant transformation of ameloblastoma via TGF- $\beta$ -dependent EMT. *Cancer Med.* **8**, 7822–7832, <https://doi.org/10.1002/cam4.2667>
- 78 DaSilva-Arnold, S.C., Kuo, C.-Y., Davra, V., Remache, Y., Kim, P.C.W., Fisher, J.P. et al. (2019) ZEB2, a master regulator of the epithelial-mesenchymal transition, mediates trophoblast differentiation. *Mol. Hum. Reprod.* **25**, 61–75, <https://doi.org/10.1093/molehr/gay053>
- 79 Cheng, L., Zhou, M.-Y., Gu, Y.-J., Chen, L. and Wang, Y. (2021) ZEB1: new advances in fibrosis and cancer. *Mol. Cell. Biochem.* **476**, 1643–1650, <https://doi.org/10.1007/s11010-020-04036-7>
- 80 Lee, J.G., Jung, E. and Heur, M. (2018) Fibroblast growth factor 2 induces proliferation and fibrosis via SNAI1-mediated activation of CDK2 and ZEB1 in corneal endothelium. *J. Biol. Chem.* **293**, 3758–3769, <https://doi.org/10.1074/jbc.RA117.000295>
- 81 Yuan, X., Pan, J., Wen, L., Gong, B., Li, J., Gao, H. et al. (2020) MiR-590-3p regulates proliferation, migration and collagen synthesis of cardiac fibroblast by targeting ZEB1. *J. Cell. Mol. Med.* **24**, 227–237, <https://doi.org/10.1111/jcmm.14704>
- 82 Yao, L., Conforti, F., Hill, C., Bell, J., Drawater, L., Li, J. et al. (2019) Paracrine signalling during ZEB1-mediated epithelial-mesenchymal transition augments local myofibroblast differentiation in lung fibrosis. *Cell Death Differ.* **26**, 943–957, <https://doi.org/10.1038/s41418-018-0175-7>
- 83 Li, L., Yang, C., Yang, J., Li, H., Zhang, B., Zhou, H. et al. (2019) ZEB1 regulates the activation of hepatic stellate cells through Wnt/ $\beta$ -catenin signaling pathway. *Eur. J. Pharmacol.* **865**, 172787, <https://www.sciencedirect.com/science/article/pii/S0014299919307393>, <https://doi.org/10.1016/j.ejphar.2019.172787>
- 84 Cunnington, R.H., Northcott, J.M., Ghavami, S., Filomeno, K.L., Jahan, F., Kavosh, M.S. et al. (2014) The Ski-Zeb2-Meox2 pathway provides a novel mechanism for regulation of the cardiac myofibroblast phenotype. *J. Cell Sci.* **127**, 40–49
- 85 Peinado, H., Olmeda, D. and Cano, A. (2007) Snail, Zeb and bHLH factors in tumour progression: an alliance against the epithelial phenotype? *Nat. Rev. Cancer* **7**, 415–428, <https://doi.org/10.1038/nrc2131>
- 86 Shi, Y., Sawada, J., Sui, G., Affar, E.B., Whetstone, J.R., Lan, F. et al. (2003) Coordinated histone modifications mediated by a CtBP co-repressor complex. *Nature* **422**, 735–738, <https://doi.org/10.1038/nature01550>
- 87 Byles, V., Zhu, L., Lovaas, J.D., Chmielewski, L.K., Wang, J., Faller, D.V. et al. (2012) SIRT1 induces EMT by cooperating with EMT transcription factors and enhances prostate cancer cell migration and metastasis. *Oncogene* **31**, 4619–4629, <https://doi.org/10.1038/ncr.2011.612>
- 88 Aghdassi, A., Sendler, M., Guenther, A., Mayerle, J., Behn, C.-O., Heidecke, C.-D. et al. (2012) Recruitment of histone deacetylases HDAC1 and HDAC2 by the transcriptional repressor ZEB1 downregulates E-cadherin expression in pancreatic cancer. *Gut* **61**, 439LP–448LP, <http://gut.bmj.com/content/61/3/439.abstract>, <https://doi.org/10.1136/gutjnl-2011-300060>
- 89 Chamberian, E.M. and Sanders, M.M. (1999) Identification of the novel player  $\delta$ EF1 in estrogen transcriptional cascades. *Mol. Cell. Biol.* **19**, 3600–3606, <https://doi.org/10.1128/MCB.19.5.3600>
- 90 Lazarova, D.L., Bordonaro, M. and Sartorelli, A.C. (2001) Transcriptional regulation of the vitamin D3 receptor gene by ZEB. *Cell Growth Differ.* **12**, 319–326, <http://cgd.aacrjournals.org/cgi/content/abstract/12/6/319>
- 91 Dillner, N.B. and Sanders, M.M. (2002) The zinc finger/homeodomain protein  $\delta$ EF1 mediates estrogen-specific induction of the ovalbumin gene. *Mol. Cell. Endocrinol.* **192**, 85–91, <https://www.sciencedirect.com/science/article/pii/S0303720702000886>, [https://doi.org/10.1016/S0303-7207\(02\)00088-6](https://doi.org/10.1016/S0303-7207(02)00088-6)
- 92 Postigo, A.A. (2003) Opposing functions of ZEB proteins in the regulation of the TGF $\beta$ /BMP signaling pathway. *EMBO J.* **22**, 2443–2452, <https://doi.org/10.1093/emboj/cdg225>
- 93 Postigo, A.A., Depp, J.L., Taylor, J.J. and Kroll, K.L. (2003) Regulation of Smad signaling through a differential recruitment of coactivators and corepressors by ZEB proteins. *EMBO J.* **22**, 2453–2462, <https://doi.org/10.1093/emboj/cdg226>
- 94 van Grunsven, L.A., Taelman, V., Michiels, C., Opdecamp, K., Huylebroeck, D. and Bellefroid, E.J. (2006)  $\delta$ EF1 and SIP1 are differentially expressed and have overlapping activities during Xenopus embryogenesis. *Dev. Dyn.* **235**, 1491–1500, <https://doi.org/10.1002/dvdy.20727>
- 95 Nishimura, G., Manabe, I., Tsushima, K., Fujii, K., Oishi, Y., Imai, Y. et al. (2006)  $\delta$ EF1 mediates TGF- $\beta$  signaling in vascular smooth muscle cell differentiation. *Dev. Cell* **11**, 93–104, <https://www.sciencedirect.com/science/article/pii/S1534580706002498>, <https://doi.org/10.1016/j.devcel.2006.05.011>
- 96 Feldker, N., Ferrazzi, F., Schuhwerk, H., Widholz, S.A., Guenther, K., Frisch, I. et al. (2020) Genome-wide cooperation of EMT transcription factor ZEB1 with YAP and AP-1 in breast cancer. *EMBO J.* **39**, e103209, <https://doi.org/10.15252/emboj.2019103209>
- 97 Simpson, P. (1983) Maternal-zygotic gene interactions during formation of the dorsoventral pattern in Drosophila embryos. *Genetics* **105**, 615–632, <https://doi.org/10.1093/genetics/105.3.615>
- 98 Nüsslein-Volhard, C., Wieschaus, E. and Kluding, H. (1984) Mutations affecting the pattern of the larval cuticle in Drosophila melanogaster. *Arch. Dev. Biol.* **193**, 267–282, <https://doi.org/10.1007/BF00848156>
- 99 Oda, H., Tsukita, S. and Takeichi, M. (1998) Dynamic behavior of the cadherin-based cell-cell adhesion system during Drosophila gastrulation. *Dev. Biol.* **203**, 435–450, <https://www.sciencedirect.com/science/article/pii/S0012160698990479>, <https://doi.org/10.1006/dbio.1998.9047>
- 100 Chen, Z.F. and Behringer, R.R. (1995) twist is required in head mesenchyme for cranial neural tube morphogenesis. *Genes Dev.* **9**, 686–699, <http://genesdev.cshlp.org/content/9/6/686.abstract>, <https://doi.org/10.1101/gad.9.6.686>
- 101 Soo, K., O'Rourke, M.P., Khoo, P.-L., Steiner, K.A., Wong, N., Behringer, R.R. et al. (2002) Twist function is required for the morphogenesis of the cephalic neural tube and the differentiation of the cranial neural crest cells in the mouse embryo. *Dev. Biol.* **247**, 251–270, <https://www.sciencedirect.com/science/article/pii/S0012160602906998>, <https://doi.org/10.1006/dbio.2002.0699>
- 102 Ning, X., Zhang, K., Wu, Q., Liu, M. and Sun, S. (2018) Emerging role of Twist1 in fibrotic diseases. *J. Cell. Mol. Med.* **22**, 1383–1391, <https://doi.org/10.1111/jcmm.13465>
- 103 Chen, Y., Zhao, X., Sun, J., Su, W., Zhang, L., Li, Y. et al. (2019) YAP1/Twist promotes fibroblast activation and lung fibrosis that conferred by miR-15a loss in IPF. *Cell Death Differ.* **26**, 1832–1844, <https://doi.org/10.1038/s41418-018-0250-0>



- 104 Yang, M.-H., Wu, M.-Z., Chiou, S.-H., Chen, P.-M., Chang, S.-Y., Liu, C.-J. et al. (2008) Direct regulation of TWIST by HIF-1 $\alpha$  promotes metastasis. *Nat. Cell Biol.* **10**, 295–305, <https://doi.org/10.1038/ncb1691>
- 105 Yang, J., Mani, S.A., Donaher, J.L., Ramaswamy, S., Itzykson, R.A., Come, C. et al. (2004) Twist, a master regulator of morphogenesis, plays an essential role in tumor metastasis. *Cell* **117**, 927–939, <https://www.sciencedirect.com/science/article/pii/S0092867404005768>, <https://doi.org/10.1016/j.cell.2004.06.006>
- 106 Alexander, N.R., Tran, N.L., Rekapally, H., Summers, C.E., Glackin, C. and Heimark, R.L. (2006) N-cadherin gene expression in prostate carcinoma is modulated by integrin-dependent nuclear translocation of Twist1. *Cancer Res.* **66**, 3365LP–3369LP, <http://cancerres.aacrjournals.org/content/66/7/3365.abstract>, <https://doi.org/10.1158/0008-5472.CAN-05-3401>
- 107 Vesuna, F., van Diest, P., Chen, J.H. and Raman, V. (2008) Twist is a transcriptional repressor of E-cadherin gene expression in breast cancer. *Biochem. Biophys. Res. Commun.* **367**, 235–241, <https://www.sciencedirect.com/science/article/pii/S0006291X07025752>, <https://doi.org/10.1016/j.bbrc.2007.11.151>
- 108 Fu, J., Qin, L., He, T., Qin, J., Hong, J., Wong, J. et al. (2011) The TWIST/Mi2/NuRD protein complex and its essential role in cancer metastasis. *Cell Res.* **21**, 275–289, <https://doi.org/10.1038/cr.2010.118>
- 109 Avsarala, S., Van Scoyk, M., Karuppusamy Rathinam, M.K., Zerayesus, S., Zhao, X., Zhang, W. et al. (2015) PRMT1 is a novel regulator of epithelial-mesenchymal-transition in non-small cell lung cancer\*. *J. Biol. Chem.* **290**, 13479–13489, <https://doi.org/10.1074/jbc.M114.636050>
- 110 Pérez-Moreno, M.A., Locascio, A., Rodrigo, I., Dhondt, G., Portillo, F., Nieto, M.A. et al. (2001) A new role for E12/E47 in the repression of *E-cadherin* expression and epithelial-mesenchymal transitions\*. *J. Biol. Chem.* **276**, 27424–27431, <https://doi.org/10.1074/jbc.M100827200>
- 111 Slattery, C., McMorrow, T. and Ryan, M.P. (2006) Overexpression of E2A proteins induces epithelial-mesenchymal transition in human renal proximal tubular epithelial cells suggesting a potential role in renal fibrosis. *FEBS Lett.* **580**, 4021–4030, <https://www.sciencedirect.com/science/article/pii/S0014579306007460>, <https://doi.org/10.1016/j.febslet.2006.06.039>
- 112 Cubillo, E., Diaz-Lopez, A., Cuevas, E.P., Moreno-Bueno, G., Peinado, H., Montes, A. et al. (2013) E47 and Id1 interplay in epithelial-mesenchymal transition. *PLoS ONE* **8**, e59948, <https://doi.org/10.1371/journal.pone.0059948>
- 113 Zhu, G., Li, X., Guo, B., Ke, Q., Dong, M. and Li, F. (2016) PAK5-mediated E47 phosphorylation promotes epithelial-mesenchymal transition and metastasis of colon cancer. *Oncogene* **35**, 1943–1954, <https://doi.org/10.1038/onc.2015.259>
- 114 Sun, F. and Hu, K. (2015) Krüppel-like factor 4 inhibits the transforming growth factor- $\beta$ 1-promoted epithelial-to-mesenchymal transition via downregulating plasminogen activator inhibitor-1 in lung epithelial cells. *Dis Markers* **2015**, 473742, <https://doi.org/10.1155/2015/473742>
- 115 Li, Q., Song, W., Wang, W., Yao, S., Tian, C., Cai, X. et al. (2016) Suppression of epithelial-mesenchymal transition in hepatocellular carcinoma cells by Krüppel-like factor 4. *Oncotarget* **7**, 29749–29760, <https://doi.org/10.18632/oncotarget.8831>
- 116 Liu, S., Yang, H., Chen, Y., He, B. and Chen, Q. (2016) Krüppel-like factor 4 enhances sensitivity of cisplatin to lung cancer cells and inhibits regulating epithelial-to-mesenchymal transition. *Oncol. Res.* **24**, 81–87, <https://doi.org/10.3727/096504016X14597766487717>
- 117 Wang, X., Li, X., Huang, C., Li, L., Qu, H., Yu, X. et al. (2016) Krüppel-like factor 4 (KLF-4) inhibits the epithelial-to-mesenchymal transition and proliferation of human endometrial carcinoma cells. *Gynecol. Endocrinol.* **32**, 772–776, <https://doi.org/10.3109/09513590.2016.1163673>
- 118 Tiwari, A., Loughner, C.L., Swamynathan, S. and Swamynathan, S.K. (2017) KLF4 plays an essential role in corneal epithelial homeostasis by promoting epithelial cell fate and suppressing epithelial-mesenchymal transition. *Invest. Ophthalmol. Vis. Sci.* **58**, 2785–2795, <https://doi.org/10.1167/iovs.17-21826>
- 119 Lin, L., Han, Q., Xiong, Y., Li, T., Liu, Z., Xu, H. et al. (2017) Krüppel-like-factor 4 attenuates lung fibrosis via inhibiting epithelial-mesenchymal transition. *Sci. Rep.* **7**, 15847, <https://doi.org/10.1038/s41598-017-14602-7>
- 120 Li, X., Zhao, Z., Zhang, X., Yang, S., Lin, X., Yang, X. et al. (2017) Klf4 reduces stemness phenotype, triggers mesenchymal-epithelial transition (MET)-like molecular changes, and prevents tumor progression in nasopharyngeal carcinoma. *Oncotarget* **8**, 93924–93941, <https://doi.org/10.18632/oncotarget.21370>
- 121 Kong, F., Sun, T., Kong, X., Xie, D., Li, Z. and Xie, K. (2018) Krüppel-like factor 4 suppresses serine/threonine kinase 33 activation and metastasis of gastric cancer through reversing epithelial-mesenchymal transition. *Clin. Cancer Res.* **24**, 2440LP–2451LP, <http://clincancerres.aacrjournals.org/content/24/10/2440.abstract>, <https://doi.org/10.1158/1078-0432.CCR-17-3346>
- 122 Zhu, Z., Yu, Z., Wang, J., Zhou, L., Zhang, J., Yao, B. et al. (2018) Krüppel-like factor 4 inhibits pancreatic cancer epithelial-to-mesenchymal transition and metastasis by down-regulating Caveolin-1 expression. *Cell Physiol. Biochem.* **46**, 238–252, <https://doi.org/10.1159/000488426>
- 123 Agbo, K.C., Huang, J.Z., Ghaleb, A.M., Williams, J.L., Shroyer, K.R., Bialkowska, A.B. et al. (2019) Loss of the Krüppel-like factor 4 tumor suppressor is associated with epithelial-mesenchymal transition in colorectal cancer. *J. Cancer Metastasis Treat.* **5**, 77, <https://doi.org/10.20517/2394-4722.2019.35>
- 124 Wang, X., Zheng, M., Liu, G., Xia, W., McKeown-Longo, P.J., Hung, M.-C. et al. (2007) Krüppel-like factor 8 induces epithelial to mesenchymal transition and epithelial cell invasion. *Cancer Res.* **67**, 7184LP–7193LP, <http://cancerres.aacrjournals.org/content/67/15/7184.abstract>, <https://doi.org/10.1158/0008-5472.CAN-06-4729>
- 125 Yi, X., Zai, H., Long, X., Wang, X., Li, W. and Li, Y. (2017) Krüppel-like factor 8 induces epithelial-to-mesenchymal transition and promotes invasion of pancreatic cancer cells through transcriptional activation of four and a half LIM-only protein 2. *Oncol. Lett.* **14**, 4883–4889, <https://doi.org/10.3892/ol.2017.6734>
- 126 Zhang, H., Liu, L., Wang, Y., Zhao, G., Xie, R., Liu, C. et al. (2013) KLF8 involves in TGF- $\beta$ -induced EMT and promotes invasion and migration in gastric cancer cells. *J. Cancer Res. Clin. Oncol.* **139**, 1033–1042, <https://doi.org/10.1007/s00432-012-1363-3>
- 127 Mishra, V.K., Subramaniam, M., Kari, V., Pitel, K.S., Baumgart, S.J., Naylor, R.M. et al. (2017) Krüppel-like transcription factor KLF10 suppresses TGF $\beta$ -induced epithelial-to-mesenchymal transition via a negative feedback mechanism. *Cancer Res.* **77**, 2387LP–2400LP, <http://cancerres.aacrjournals.org/content/77/9/2387.abstract>, <https://doi.org/10.1158/0008-5472.CAN-16-2589>



- 128 Tomlinson, D.C., Baxter, E.W., Loadman, P.M., Hull, M.A. and Knowles, M.A. (2012) FGFR1-induced epithelial to mesenchymal transition through MAPK/PLC $\gamma$ /COX-2-mediated mechanisms. *PLoS ONE* **7**, e38972, <https://doi.org/10.1371/journal.pone.0038972>
- 129 Hopkins, A., Coatham, M.L. and Berry, F.B. (2017) FOXC1 regulates FGFR1 isoform switching to promote invasion following TGF $\beta$ -induced EMT. *Mol. Cancer Res.* **15**, 1341LP–1353LP, <http://mcr.aacrjournals.org/content/15/10/1341.abstract>, <https://doi.org/10.1158/1541-7786.MCR-17-0185>
- 130 Ou-Yang, L., Xiao, S., Liu, P., Yi, S., Zhang, X., Ou-Yang, S. et al. (2015) Forkhead box C1 induces epithelial-mesenchymal transition and is a potential therapeutic target in nasopharyngeal carcinoma. *Mol. Med. Rep.* **12**, 8003–8009, <https://doi.org/10.3892/mmr.2015.4427>
- 131 Zhu, X., Wei, L., Bai, Y., Wu, S. and Han, S. (2017) FoxC1 promotes epithelial-mesenchymal transition through PBX1 dependent transactivation of ZEB2 in esophageal cancer. *Am. J. Cancer Res.* **7**, 1642–1653
- 132 Zuo, H. and Yang, Q. (2018) The potential pathway of FOXC1 high expression in regulating the proliferation, migration, cell cycle and epithelialmesenchymal transition of basal-like breast cancer and in vivo imaging. *J. BUON* **23**, 720–728
- 133 Cao, Q., Wang, X., Shi, Y., Zhang, M., Yang, J., Dong, M. et al. (2019) FOXC1 silencing inhibits the epithelial-to-mesenchymal transition of glioma cells: Involvement of  $\beta$ -catenin signaling. *Mol. Med. Rep.* **19**, 251–261
- 134 Huang, L., Huang, Z., Fan, Y., He, L., Ye, M., Shi, K. et al. (2017) FOXC1 promotes proliferation and epithelial-mesenchymal transition in cervical carcinoma through the PI3K-AKT signal pathway. *Am. J. Transl. Res.* **9**, 1297–1306
- 135 Mani, S.A., Yang, J., Brooks, M., Schwaninger, G., Zhou, A., Miura, N. et al. (2007) Mesenchyme Forkhead 1 (FOXC2) plays a key role in metastasis and is associated with aggressive basal-like breast cancers. *Proc. Natl. Acad. Sci. U.S.A.* **104**, 10069LP–10074LP, <http://www.pnas.org/content/104/24/10069.abstract>, <https://doi.org/10.1073/pnas.0703900104>
- 136 Hollier, B.G., Tinnirello, A.A., Werden, S.J., Evans, K.W., Taube, J.H., Sarkar, T.R. et al. (2013) FOXC2 expression links epithelial-mesenchymal transition and stem cell properties in breast cancer. *Cancer Res.* **73**, 1981LP–1992LP, <http://cancerres.aacrjournals.org/content/73/6/1981.abstract>, <https://doi.org/10.1158/0008-5472.CAN-12-2962>
- 137 Liu, B., Han, S.-M., Tang, X.-Y., Han, L. and Li, C.-Z. (2014) Overexpressed FOXC2 in ovarian cancer enhances the epithelial-to-mesenchymal transition and invasion of ovarian cancer cells. *Oncol. Rep.* **31**, 2545–2554, <https://doi.org/10.3892/or.2014.3119>
- 138 Werden, S.J., Sphyris, N., Sarkar, T.R., Paranjape, A.N., LaBaff, A.M., Taube, J.H. et al. (2016) Phosphorylation of serine 367 of FOXC2 by p38 regulates ZEB1 and breast cancer metastasis, without impacting primary tumor growth. *Oncogene* **35**, 5977–5988, <https://doi.org/10.1038/ncr.2016.203>
- 139 Zhang, H., Meng, F., Liu, G., Zhang, B., Zhu, J., Wu, F. et al. (2011) Forkhead transcription factor Foxq1 promotes epithelial-mesenchymal transition and breast cancer metastasis. *Cancer Res.* **71**, 1292LP–1301LP, <http://cancerres.aacrjournals.org/content/71/4/1292.abstract>, <https://doi.org/10.1158/0008-5472.CAN-10-2825>
- 140 Qiao, Y., Jiang, X., Lee, S.T., Karuturi, R.K.M., Hooi, S.C. and Yu, Q. (2011) FOXQ1 regulates epithelial-mesenchymal transition in human cancers. *Cancer Res.* **71**, 3076LP–3086LP, <http://cancerres.aacrjournals.org/content/71/8/3076.abstract>, <https://doi.org/10.1158/0008-5472.CAN-10-2787>
- 141 Zhu, Z., Zhu, Z., Pang, Z., Xing, Y., Wan, F., Lan, D. et al. (2013) Short hairpin RNA targeting FOXQ1 inhibits invasion and metastasis via the reversal of epithelial-mesenchymal transition in bladder cancer. *Int. J. Oncol.* **42**, 1271–1278, <https://doi.org/10.3892/ijo.2013.1807>
- 142 Zhang, J., Liu, Y., Zhang, J., Cui, X., Li, G., Wang, J. et al. (2016) FOXQ1 promotes gastric cancer metastasis through upregulation of Snail. *Oncol. Rep.* **35**, 3607–3613, <https://doi.org/10.3892/or.2016.4736>
- 143 Fan, D.-M., Feng, X.-S., Qi, P.-W. and Chen, Y.-W. (2014) Forkhead factor FOXQ1 promotes TGF- $\beta$ 1 expression and induces epithelial-mesenchymal transition. *Mol. Cell. Biochem.* **397**, 179–186, <https://doi.org/10.1007/s11010-014-2185-1>
- 144 Wu, Y., Peng, Y., Wu, M., Zhang, W., Zhang, M., Xie, R. et al. (2016) Oncogene FOXK1 enhances invasion of colorectal carcinoma by inducing epithelial-mesenchymal transition. *Oncotarget* **7**, 51150–51162, <https://doi.org/10.18632/oncotarget.9457>
- 145 Zheng, X., Lin, J., Wu, H., Mo, Z., Lian, Y., Wang, P. et al. (2019) Forkhead box (FOX) G1 promotes hepatocellular carcinoma epithelial-Mesenchymal transition by activating Wnt signal through forming T-cell factor-4/Beta-catenin/FOXG1 complex. *J. Exp. Clin. Cancer Res.* **38**, 475, <https://doi.org/10.1186/s13046-019-1433-3>
- 146 Kong, F.-F., Qu, Z.-Q., Yuan, H.-H., Wang, J.-Y., Zhao, M., Guo, Y.-H. et al. (2014) Overexpression of FOXM1 is associated with EMT and is a predictor of poor prognosis in non-small cell lung cancer. *Oncol. Rep.* **31**, 2660–2668, <https://doi.org/10.3892/or.2014.3129>
- 147 Wang, Y., Zhou, Q., Tang, R., Huang, Y. and He, T. (2020) FoxM1 inhibition ameliorates renal interstitial fibrosis by decreasing extracellular matrix and epithelial-mesenchymal transition. *J. Pharmacol. Sci.* **143**, 281–289, <https://www.sciencedirect.com/science/article/pii/S1347861320300517>, <https://doi.org/10.1016/j.jphs.2020.05.007>
- 148 Wang, Q.-S., Kong, P.-Z., Li, X.-Q., Yang, F. and Feng, Y.-M. (2015) FOXF2 deficiency promotes epithelial-mesenchymal transition and metastasis of basal-like breast cancer. *Breast Cancer Res.* **17**, 30, <https://doi.org/10.1186/s13058-015-0531-1>
- 149 Ye, H. and Duan, M. (2019) FOXN2 is downregulated in breast cancer and regulates migration, invasion, and epithelial- mesenchymal transition through regulation of SLUG. *Cancer Manag Res.* **11**, 525–535, <https://doi.org/10.2147/CMAR.S176938>
- 150 Liu, H., Yin, J., Wang, H., Jiang, G., Deng, M., Zhang, G. et al. (2015) FOXO3a modulates WNT/ $\beta$ -catenin signaling and suppresses epithelial-to-mesenchymal transition in prostate cancer cells. *Cell. Signal.* **27**, 510–518, <https://www.sciencedirect.com/science/article/pii/S0898656815000030>, <https://doi.org/10.1016/j.cellsig.2015.01.001>
- 151 Liu, T., Huang, J., Lei, Z., Yan, R. and Fan, D. (2020) FoxO3a depletion accelerates cutaneous wound healing by regulating epithelial-mesenchymal transition through  $\beta$ -catenin activation. *Mol. Med. Rep.* **21**, 1224–1232, <https://doi.org/10.3892/mmr.2020.10912>
- 152 Cai, J., Tian, A.-X., Wang, Q.-S., Kong, P.-Z., Du, X., Li, X.-Q. et al. (2015) FOXF2 suppresses the FOXC2-mediated epithelial-mesenchymal transition and multidrug resistance of basal-like breast cancer. *Cancer Lett.* **367**, 129–137, <https://doi.org/10.1016/j.canlet.2015.07.001>
- 153 Kang, L.-J., Yu, Z.-H., Cai, J., He, R., Lu, J.-T., Hou, C. et al. (2019) Reciprocal transrepression between FOXF2 and FOXQ1 controls basal-like breast cancer aggressiveness. *FASEB J.* **33**, 6564–6573, <https://doi.org/10.1096/fj.201801916R>

- 154 Zhang, J., Liang, Q., Lei, Y., Yao, M., Li, L., Gao, X. et al. (2012) SOX4 induces epithelial-mesenchymal transition and contributes to breast cancer progression. *Cancer Res.* **72**, 4597LP–4608LP, <http://cancerres.aacrjournals.org/content/72/17/4597.abstract>, <https://doi.org/10.1158/0008-5472.CAN-12-1045>
- 155 Tiwari, N., Tiwari, V.K., Waldmeier, L., Balwierz, P.J., Arnold, P., Pachkov, M. et al. (2013) Sox4 is a master regulator of epithelial-mesenchymal transition by controlling Ezh2 expression and epigenetic reprogramming. *Cancer Cell* **23**, 768–783, <https://www.sciencedirect.com/science/article/pii/S1535610813001852>, <https://doi.org/10.1016/j.ccr.2013.04.020>
- 156 Wang, L., Zhang, J., Yang, X., Chang, Y.W.Y., Qi, M., Zhou, Z. et al. (2013) SOX4 is associated with poor prognosis in prostate cancer and promotes epithelial-mesenchymal transition in vitro. *Prostate Cancer Prostatic Dis.* **16**, 301–307, <https://doi.org/10.1038/pcan.2013.25>
- 157 Vervoort, S.J., Lourenço, A.R., van Boxtel, R. and Coffey, P.J. (2013) SOX4 mediates TGF- $\beta$ -induced expression of mesenchymal markers during mammary cell epithelial to mesenchymal transition. *PLoS ONE* **8**, e53238, <https://doi.org/10.1371/journal.pone.0053238>
- 158 Wang, L., Li, Y., Yang, X., Yuan, H., Li, X., Qi, M. et al. (2014) ERG-SOX4 interaction promotes epithelial-mesenchymal transition in prostate cancer cells. *Prostate* **74**, 647–658, <https://doi.org/10.1002/pros.22783>
- 159 Ruan, H., Yang, H., Wei, H., Xiao, W., Lou, N., Qiu, B. et al. (2017) Overexpression of SOX4 promotes cell migration and invasion of renal cell carcinoma by inducing epithelial-mesenchymal transition. *Int. J. Oncol.* **51**, 336–346, <https://doi.org/10.3892/ijo.2017.4010>
- 160 Peng, X., Liu, G., Peng, H., Chen, A., Zha, L. and Wang, Z. (2018) SOX4 contributes to TGF- $\beta$ -induced epithelial-mesenchymal transition and stem cell characteristics of gastric cancer cells. *Genes Dis.* **5**, 49–61, <https://www.sciencedirect.com/science/article/pii/S2352304217301022>, <https://doi.org/10.1016/j.gendis.2017.12.005>
- 161 Sasaki, A., Abe, H., Mochizuki, S., Shimoda, M. and Okada, Y. (2018) SOX4, an epithelial-mesenchymal transition inducer, transactivates ADAM28 gene expression and co-localizes with ADAM28 at the invasive front of human breast and lung carcinomas. *Pathol. Int.* **68**, 449–458, <https://doi.org/10.1111/pin.12685>
- 162 Spokony, R.F., Aoki, Y., Saint-Germain, N., Magner-Fink, E. and Saint-Jeannet, J.-P. (2002) The transcription factor Sox9 is required for cranial neural crest development in *Xenopus*. *Development* **129**, 421–432, <https://doi.org/10.1242/dev.129.2.421>
- 163 Cheung, M. and Briscoe, J. (2003) Neural crest development is regulated by the transcription factor Sox9. *Development* **130**, 5681–5693, <https://doi.org/10.1242/dev.00808>
- 164 Piper Hanley, K., Oakley, F., Sugden, S., Wilson, D.I., Mann, D.A. and Hanley, N.A. (2008) Ectopic SOX9 mediates extracellular matrix deposition characteristic of organ fibrosis\*. *J. Biol. Chem.* **283**, 14063–14071, <https://doi.org/10.1074/jbc.M707390200>
- 165 Huang, J. and Guo, L. (2017) Knockdown of SOX9 inhibits the proliferation, invasion, and EMT in thyroid cancer cells. *Oncol. Res.* **25**, 167–176, <https://doi.org/10.3727/096504016X14732772150307>
- 166 Francis, J.C., Capper, A., Ning, J., Knight, E., de Bono, J. and Swain, A. (2018) SOX9 is a driver of aggressive prostate cancer by promoting invasion, cell fate and cytoskeleton alterations and epithelial to mesenchymal transition. *Oncotarget* **9**, 7604–7615, <https://doi.org/10.18632/oncotarget.24123>
- 167 Huang, J.-Q., Wei, F.-K., Xu, X.-L., Ye, S.-X., Song, J.-W., Ding, P.-K. et al. (2019) SOX9 drives the epithelial-mesenchymal transition in non-small-cell lung cancer through the Wnt/ $\beta$ -catenin pathway. *J. Transl. Med.* **17**, 143, <https://doi.org/10.1186/s12967-019-1895-2>
- 168 Zhou, H., Li, G., Huang, S., Feng, Y. and Zhou, A. (2019) SOX9 promotes epithelial-mesenchymal transition via the Hippo-YAP signaling pathway in gastric carcinoma cells. *Oncol. Lett.* **18**, 599–608, <https://doi.org/10.3892/ol.2019.10387>
- 169 Hirano, T., Saito, D., Yamada, H., Ishisaki, A. and Kamo, M. (2020) TGF- $\beta$ 1 induces N-cadherin expression by upregulating Sox9 expression and promoting its nuclear translocation in human oral squamous cell carcinoma cells. *Oncol. Lett.* **20**, 474–482, <https://doi.org/10.3892/ol.2020.11582>
- 170 Luanpitpong, S., Li, J., Manke, A., Brundage, K., Ellis, E., McLaughlin, S.L. et al. (2016) SLUG is required for SOX9 stabilization and functions to promote cancer stem cells and metastasis in human lung carcinoma. *Oncogene* **35**, 2824–2833, <https://doi.org/10.1038/nc.2015.351>
- 171 Xiao, Y., Xie, Q., Qin, Q., Liang, Y., Lin, H. and Zeng, D. (2020) Upregulation of SOX11 enhances tamoxifen resistance and promotes epithelial-to-mesenchymal transition via slug in MCF-7 breast cancer cells. *J. Cell. Physiol.* **235**, 7295–7308, <https://doi.org/10.1002/jcp.29629>
- 172 Ollmuller, E., Newman, R., Tsang, S.M., Foo, S., Muirhead, G., Noor, F. et al. (2020) SOX11 promotes epithelial/mesenchymal hybrid state and alters tropism of invasive breast cancer cells. *eLife* **9**, e58374
- 173 Li, Q., Lai, Q., He, C., Fang, Y., Yan, Q., Zhang, Y. et al. (2019) RUNX1 promotes tumour metastasis by activating the Wnt/ $\beta$ -catenin signalling pathway and EMT in colorectal cancer. *J. Exp. Clin. Cancer Res.* **38**, 334, <https://doi.org/10.1186/s13046-019-1330-9>
- 174 Lu, C., Yang, Z., Yu, D., Lin, J. and Cai, W. (2020) RUNX1 regulates TGF- $\beta$  induced migration and EMT in colorectal cancer. *Pathol. Res. Pract.* **216**, 153142, <https://www.sciencedirect.com/science/article/pii/S034403382031997X>, <https://doi.org/10.1016/j.prp.2020.153142>
- 175 Zhou, T., Luo, M., Cai, W., Zhou, S., Feng, D., Xu, C. et al. (2018) Runt-related transcription factor 1 (RUNX1) promotes TGF- $\beta$ -induced renal tubular epithelial-to-mesenchymal transition (EMT) and renal fibrosis through the PI3K subunit p110 $\delta$ . *EBioMedicine* **31**, 217–225, <https://www.sciencedirect.com/science/article/pii/S2352396418301518>, <https://doi.org/10.1016/j.ebiom.2018.04.023>
- 176 Niu, D.-F., Kondo, T., Nakazawa, T., Oishi, N., Kawasaki, T., Mochizuki, K. et al. (2012) Transcription factor Runx2 is a regulator of epithelial-mesenchymal transition and invasion in thyroid carcinomas. *Lab Invest.* **92**, 1181–1190, <https://doi.org/10.1038/labinvest.2012.84>
- 177 Cao, Z., Sun, B., Zhao, X., Zhang, Y., Gu, Q., Liang, X. et al. (2017) The expression and functional significance of Runx2 in hepatocellular carcinoma: its role in vasculogenic mimicry and epithelial-mesenchymal transition. *Int. J. Mol. Sci.* **18**, 500, <https://doi.org/10.3390/ijms18030500>
- 178 Liu, B., Liu, J., Yu, H., Wang, C. and Kong, C. (2020) Transcription factor RUNX2 regulates epithelial-mesenchymal transition and progression in renal cell carcinomas. *Oncol. Rep.* **43**, 609–616
- 179 Tavares, A.L.P., Brown, J.A., Ulrich, E.C., Dvorak, K. and Runyan, R.B. (2018) Runx2-1 is an early regulator of epithelial-mesenchymal cell transition in the chick embryo. *Dev. Dyn.* **247**, 542–554, <https://doi.org/10.1002/dvdy.24539>
- 180 Mümmler, C., Burgy, O., Hermann, S., Mutze, K., Günther, A. and Königshoff, M. (2018) Cell-specific expression of runt-related transcription factor 2 contributes to pulmonary fibrosis. *FASEB J.* **32**, 703–716, <https://doi.org/10.1096/fj.201700482R>

- 181 Zhou, Y., Chang, H. and Yang, B. (2018) GATA4 is upregulated in nasopharyngeal cancer and facilitates epithelial-mesenchymal transition and metastasis through regulation of SLUG. *Exp. Ther. Med.* **16**, 5318–5326, <https://doi.org/10.3892/etm.2018.6826>
- 182 Xiang, Q., Zhou, D., He, X., Fan, J., Tang, J., Qiu, Z. et al. (2019) The zinc finger protein GATA4 induces mesenchymal-to-epithelial transition and cellular senescence through the nuclear factor- $\kappa$ B pathway in hepatocellular carcinoma. *J. Gastroenterol. Hepatol.* **34**, 2196–2205, <https://doi.org/10.1111/jgh.14684>
- 183 Deng, X., Jiang, P., Chen, J., Li, J., Li, D., He, Y. et al. (2020) GATA6 promotes epithelial-mesenchymal transition and metastasis through MUC1 $\beta$ -catenin pathway in cholangiocarcinoma. *Cell Death Dis.* **11**, 860, <https://doi.org/10.1038/s41419-020-03070-z>
- 184 Song, Y., Tian, T., Fu, X., Wang, W., Li, S., Shi, T. et al. (2015) GATA6 is overexpressed in breast cancer and promotes breast cancer cell epithelial-mesenchymal transition by upregulating slug expression. *Exp. Mol. Pathol.* **99**, 617–627, <https://www.sciencedirect.com/science/article/pii/S0014480015002117>, <https://doi.org/10.1016/j.yexmp.2015.10.005>
- 185 Campbell, K., Whissell, G., Franch-Marro, X., Batlle, E. and Casanova, J. (2011) Specific GATA factors act as conserved inducers of an endodermal-EMT. *Dev. Cell* **21**, 1051–1061, <https://www.sciencedirect.com/science/article/pii/S1534580711004229>, <https://doi.org/10.1016/j.devcel.2011.10.005>
- 186 Martinelli, P., Carrillo-de Santa Pau, E., Cox, T., Sainz, B., Dusetti, N., Greenhalf, W. et al. (2017) GATA6 regulates EMT and tumour dissemination, and is a marker of response to adjuvant chemotherapy in pancreatic cancer. *Gut* **66**, 1665LP–1676LP, <http://gut.bmj.com/content/66/9/1665.abstract>, <https://doi.org/10.1136/gutjnl-2015-311256>
- 187 Martínez-Estrada, O.M., Lettice, L.A., Essafi, A., Guadix, J.A., Slight, J., Velecela, V. et al. (2010) Wt1 is required for cardiovascular progenitor cell formation through transcriptional control of Snail and E-cadherin. *Nat. Genet.* **42**, 89–93, <https://doi.org/10.1038/ng.494>
- 188 Han, Y., Song, C., Zhang, T., Zhou, Q., Zhang, X., Wang, J. et al. (2020) Wilms' tumor 1 (WT1) promotes ovarian cancer progression by regulating E-cadherin and ERK1/2 signaling. *Cell Cycle* **19**, 2662–2675, <https://doi.org/10.1080/15384101.2020.1817666>
- 189 Bax, N.A.M., van Oorschot, A.A.M., Maas, S., Braun, J., van Tuyn, J., de Vries, A.A.F. et al. (2011) In vitro epithelial-to-mesenchymal transformation in human adult epicardial cells is regulated by TGF $\beta$ -signaling and WT1. *Basic Res. Cardiol.* **106**, 829–847, <https://doi.org/10.1007/s00395-011-0181-0>
- 190 Takeichi, M., Nimura, K., Mori, M., Nakagami, H. and Kaneda, Y. (2013) The transcription factors Tbx18 and Wt1 Control the epicardial epithelial-mesenchymal transition through bi-directional regulation of Slug in murine primary epicardial cells. *PLoS ONE* **8**, e57829, <https://doi.org/10.1371/journal.pone.0057829>
- 191 Sampson, V.B., David, J.M., Puig, I., Patil, P.U., de Herreros, A.G., Thomas, G.V. et al. (2014) Wilms' tumor protein induces an epithelial-mesenchymal hybrid differentiation state in clear cell renal cell carcinoma. *PLoS ONE* **9**, e102041, <https://doi.org/10.1371/journal.pone.0102041>
- 192 Sontake, V., Kasam, R.K., Sinner, D., Korfhagen, T.R., Reddy, G.B., White, E.S. et al. (2018) Wilms' tumor 1 drives fibroproliferation and myofibroblast transformation in severe fibrotic lung disease. *JCI Insight* **3**, e121252, <https://doi.org/10.1172/jci.insight.121252>
- 193 Hartwell, K.A., Muir, B., Reinhardt, F., Carpenter, A.E., Sgroi, D.C. and Weinberg, R.A. (2006) The Spemann organizer gene, Goosecoid, promotes tumor metastasis. *Proc. Natl. Acad. Sci. U.S.A.* **103**, 18969LP–18974LP, <http://www.pnas.org/content/103/50/18969.abstract>, <https://doi.org/10.1073/pnas.0608636103>
- 194 Xue, T.-C., Ge, N.-L., Zhang, L., Cui, J.-F., Chen, R.-X., You, Y. et al. (2014) Goosecoid promotes the metastasis of hepatocellular carcinoma by modulating the epithelial-mesenchymal transition. *PLoS ONE* **9**, e109695, <https://doi.org/10.1371/journal.pone.0109695>
- 195 Niehrs, C., Keller, R., Cho, K.W.Y. and De Robertis, E.M. (1993) The homeobox gene goosecoid controls cell migration in *Xenopus* embryos. *Cell* **72**, 491–503, <https://www.sciencedirect.com/science/article/pii/0092867493900693>, [https://doi.org/10.1016/0092-8674\(93\)90069-3](https://doi.org/10.1016/0092-8674(93)90069-3)
- 196 Micalizzi, D.S., Christensen, K.L., Jedlicka, P., Coletta, R.D., Barón, A.E., Harrell, J.C. et al. (2009) The Six1 homeoprotein induces human mammary carcinoma cells to undergo epithelial-mesenchymal transition and metastasis in mice through increasing TGF- $\beta$  signaling. *J. Clin. Invest.* **119**, 2678–2690, <https://doi.org/10.1172/JCI37815>
- 197 Ono, H., Imoto, I., Kozaki, K., Tsuda, H., Matsui, T., Kurasawa, Y. et al. (2012) SIX1 promotes epithelial-mesenchymal transition in colorectal cancer through ZEB1 activation. *Oncogene* **31**, 4923–4934, <https://doi.org/10.1038/onc.2011.646>
- 198 Xu, H., Zhang, Y., Altomare, D., Peña, M.M., Wan, F., Pirisi, L. et al. (2014) Six1 promotes epithelial-mesenchymal transition and malignant conversion in human papillomavirus type 16-immortalized human keratinocytes. *Carcinogenesis* **35**, 1379–1388, <https://doi.org/10.1093/carcin/bgu050>
- 199 Sun, S., Liu, D., Deng, Y., Zhang, X., Wan, D., Xi, B. et al. (2016) SIX1 coordinates with TGF $\beta$  signals to induce epithelial-mesenchymal transition in cervical cancer. *Oncol. Lett.* **12**, 1271–1278, <https://doi.org/10.3892/ol.2016.4797>
- 200 Wang, Z., Schmidt, F., Weisblum, Y., Muecksch, F., Barnes, C.O., Fink, S. et al. (2021) mRNA vaccine-elicited antibodies to SARS-CoV-2 and circulating variants. *Nature* **592**, 616–622, <https://doi.org/10.1038/s41586-021-03324-6>
- 201 Wang, W., Yang, Z., Li, M., Wang, Z., Shan, Y. and Qu, Z. (2021) Six1 promotes epithelial-mesenchymal transition in bronchial epithelial cells via the TGF $\beta$ 1/Smad signalling pathway. *Int. Arch. Allergy Immunol.* **182**, 479–488, <https://doi.org/10.1159/000512873>
- 202 Guo, J., Fu, Z., Wei, J., Lu, W., Feng, J. and Zhang, S. (2014) PRRX1 promotes epithelial-mesenchymal transition through the Wnt/ $\beta$ -catenin pathway in gastric cancer. *Med. Oncol.* **32**, 393, <https://doi.org/10.1007/s12032-014-0393-x>
- 203 Sun, L., Han, T., Zhang, X., Liu, X., Li, P., Shao, M. et al. (2020) PRRX1 isoform PRRX1A regulates the stemness phenotype and epithelial-mesenchymal transition (EMT) of cancer stem-like cells (CSCs) derived from non-small cell lung cancer (NSCLC). *Transl. Lung Cancer Res.* **9**, 731–744, <https://doi.org/10.21037/tlcr-20-633>
- 204 Jiang, Y., Tang, Y., Wang, S., Wu, J., Zhang, M., Pang, X. et al. (2020) PRRX1-induced epithelial-to-mesenchymal transition in salivary adenoid cystic carcinoma activates the metabolic reprogramming of free fatty acids to promote invasion and metastasis. *Cell Prolif.* **53**, e12705, <https://doi.org/10.1111/cpr.12705>



- 205 Ocaña, O.H., Córcoles, R., Fabra, Á., Moreno-Bueno, G., Acloque, H., Vega, S. et al. (2012) Metastatic colonization requires the repression of the epithelial-mesenchymal transition inducer Prrx1. *Cancer Cell* **22**, 709–724, <https://www.sciencedirect.com/science/article/pii/S1535610812004424>, <https://doi.org/10.1016/j.ccr.2012.10.012>
- 206 Gong, J., Han, J., He, J., Liu, J., Han, P., Wang, Y. et al. (2017) Paired related homeobox protein 1 regulates PDGF-induced chemotaxis of hepatic stellate cells in liver fibrosis. *Lab Invest.* **97**, 1020–1032, <https://doi.org/10.1038/labinvest.2017.65>
- 207 Zhu, H. and Sun, G. (2017) Loss of PRRX1 induces epithelial-mesenchymal transition and cancer stem cell-like properties in A549 cells. *Am. J. Transl. Res.* **9**, 1641–1650
- 208 Li, T.Z., Kim, S.M., Hur, W., Choi, J.E., Kim, J.-H., Hong, S.W. et al. (2017) Elk-3 contributes to the progression of liver fibrosis by regulating the epithelial-mesenchymal transition. *Gut Liver* **11**, 102–111, <https://doi.org/10.5009/gnl15566>
- 209 Cho, H.-J., Oh, N., Park, J.-H., Kim, K.-S., Kim, H.-K., Lee, E. et al. (2019) ZEB1 collaborates with ELK3 to repress E-cadherin expression in triple-negative breast cancer cells. *Mol. Cancer Res.* **17**, 2257LP–2266LP, <http://mcr.aacrjournals.org/content/17/11/2257.abstract>, <https://doi.org/10.1158/1541-7786.MCR-19-0380>
- 210 Park, J. and Park, K. (2020) SMAD3 promotes ELK3 expression following transforming growth factor  $\beta$ -mediated stimulation of MDA-MB231 cells. *Oncol. Lett.* **19**, 2749–2754
- 211 Fernando, R.I., Litzinger, M., Trono, P., Hamilton, D.H., Schlom, J. and Palena, C. (2010) The T-box transcription factor Brachyury promotes epithelial-mesenchymal transition in human tumor cells. *J. Clin. Invest.* **120**, 533–544, <https://doi.org/10.1172/JCI38379>
- 212 Imajyo, I., Sugiura, T., Kobayashi, Y., Shimoda, M., Ishii, K., Akimoto, N. et al. (2012) T-box transcription factor Brachyury expression is correlated with epithelial-mesenchymal transition and lymph node metastasis in oral squamous cell carcinoma. *Int. J. Oncol.* **41**, 1985–1995, <https://doi.org/10.3892/ijo.2012.1673>
- 213 Sun, S., Sun, W., Xia, L., Liu, L., Du, R., He, L. et al. (2014) The T-box transcription factor Brachyury promotes renal interstitial fibrosis by repressing E-cadherin expression. *Cell Commun. Signal.* **12**, 76, <https://doi.org/10.1186/s12964-014-0076-4>
- 214 Beddington, R.S.P., Rashbass, P. and Wilson, V. (1992) Brachyury - a gene affecting mouse gastrulation and early organogenesis. *Development* **116**, 157–165, <https://doi.org/10.1242/dev.116.Supplement.157>
- 215 Luo, Y.-Z., He, P. and Qiu, M.-X. (2018) FOSL1 enhances growth and metastasis of human prostate cancer cells through epithelial mesenchymal transition pathway. *Eur. Rev. Med. Pharmacol. Sci.* **22**, 8609–8615
- 216 Yin, J., Hu, W., Fu, W., Dai, L., Jiang, Z., Zhong, S. et al. (2019) HGF/MET regulated epithelial-mesenchymal transitions and metastasis By FOSL2 in non-small cell lung cancer. *Oncotargets Ther.* **12**, 9227–9237, <https://doi.org/10.2147/OTT.S217595>
- 217 Bakiri, L., Macho-Maschler, S., Custic, I., Niemiec, J., Guío-Carrión, A., Hasenfuss, S.C. et al. (2015) Fra-1/AP-1 induces EMT in mammary epithelial cells by modulating Zeb1/2 and TGF $\beta$  expression. *Cell Death Differ.* **22**, 336–350, <https://doi.org/10.1038/cdd.2014.157>
- 218 Gervasi, M., Bianchi-Smiraglia, A., Cummings, M., Zheng, Q., Wang, D., Liu, S. et al. (2012) JunB contributes to Id2 repression and the epithelial-mesenchymal transition in response to transforming growth factor- $\beta$ . *J. Cell Biol.* **196**, 589–603, <https://doi.org/10.1083/jcb.201109045>
- 219 Gong, C., Shen, J., Fang, Z., Qiao, L., Feng, R., Lin, X. et al. (2018) Abnormally expressed JunB transactivated by IL-6/STAT3 signaling promotes uveal melanoma aggressiveness via epithelial-mesenchymal transition. *Biosci. Rep.* **38**, <https://doi.org/10.1042/BSR20180532>
- 220 Yao, F., Wang, X., Cui, Z.-K., Lan, H., Ai, X., Song, Q. et al. (2020) ETS2 promotes epithelial-to-mesenchymal transition in renal fibrosis by targeting JUNB transcription. *Lab Invest.* **100**, 438–453, <https://doi.org/10.1038/s41374-019-0331-9>
- 221 Wanna-udom, S., Terashima, M., Lyu, H., Ishimura, A., Takino, T., Sakari, M. et al. (2020) The m6A methyltransferase METTL3 contributes to transforming growth factor-beta-induced epithelial-mesenchymal transition of lung cancer cells through the regulation of JUNB. *Biochem. Biophys. Res. Commun.* **524**, 150–155, <https://www.sciencedirect.com/science/article/pii/S0006291X20301054>, <https://doi.org/10.1016/j.bbrc.2020.01.042>
- 222 Roca, H., Hernandez, J., Weidner, S., McEachin, R.C., Fuller, D., Sud, S. et al. (2013) Transcription factors OVOL1 and OVOL2 induce the mesenchymal to epithelial transition in human cancer. *PLoS ONE* **8**, e76773, <https://doi.org/10.1371/journal.pone.0076773>
- 223 Watanabe, K., Liu, Y., Noguchi, S., Murray, M., Chang, J.-C., Kishima, M. et al. (2019) OVOL2 induces mesenchymal-to-epithelial transition in fibroblasts and enhances cell-state reprogramming towards epithelial lineages. *Sci. Rep.* **9**, 6490, <https://doi.org/10.1038/s41598-019-43021-z>
- 224 Jing, J., Liu, J., Wang, Y., Zhang, M., Yang, L., Shi, F. et al. (2019) The role of ZBTB38 in promoting migration and invasive growth of bladder cancer cells. *Oncol. Rep.* **41**, 1980–1990
- 225 Yuan, H., Kajiyama, H., Ito, S., Yoshikawa, N., Hyodo, T., Asano, E. et al. (2013) ALX1 induces snail expression to promote epithelial-to-mesenchymal transition and invasion of ovarian cancer cells. *Cancer Res.* **73**, 1581LP–1590LP, <http://cancerres.aacrjournals.org/content/73/5/1581.abstract>, <https://doi.org/10.1158/0008-5472.CAN-12-2377>
- 226 Dimitrova, Y., Gruber, A.J., Mittal, N., Ghosh, S., Dimitriades, B., Mathow, D. et al. (2017) TFAP2A is a component of the ZEB1/2 network that regulates TGF $\beta$ 1-induced epithelial to mesenchymal transition. *Biol. Direct* **12**, 8, <https://doi.org/10.1186/s13062-017-0180-7>
- 227 Ross, G.R., Edwards, S., Warner, C., Homar, P., Downey, F.X., Emelyanova, L. et al. (2019) Deletion of transcription factor AP-2 $\alpha$  gene attenuates fibroblast differentiation into myofibroblast. *J. Cell. Mol. Med.* **23**, 6494–6498, <https://doi.org/10.1111/jcmm.14421>
- 228 Zhao, Y., Gao, J., Xie, X., Nan, P., Liu, F., Sun, Y. et al. (2021) BACH1 promotes the progression of esophageal squamous cell carcinoma by inducing the epithelial-mesenchymal transition and angiogenesis. *Cancer Med.* **10**, 3413–3426, <https://doi.org/10.1002/cam4.3884>
- 229 Liu, Y. and Zheng, Y. (2017) Bach1 siRNA attenuates bleomycin-induced pulmonary fibrosis by modulating oxidative stress in mice. *Int. J. Mol. Med.* **39**, 91–100, <https://doi.org/10.3892/ijmm.2016.2823>
- 230 Liu, Y., Wang, Y., Lu, F., Wang, L., Miao, L. and Wang, X. (2021) BTB and CNC homology 1 inhibition ameliorates fibrosis and inflammation via blocking ERK pathway in pulmonary fibrosis. *Exp. Lung Res.* **47**, 67–77, <https://doi.org/10.1080/01902148.2020.1849448>



- 231 Meyer-Schaller, N., Cardner, M., Diepenbruck, M., Saxena, M., Tiede, S., Lüönd, F. et al. (2019) A hierarchical regulatory landscape during the multiple stages of EMT. *Dev. Cell* **48**, 539.e6–553.e6, <https://www.sciencedirect.com/science/article/pii/S1534580718311237>, <https://doi.org/10.1016/j.devcel.2018.12.023>
- 232 Shin, E.M., Sin Hay, H., Lee, M.H., Goh, J.N., Tan, T.Z., Sen, Y.P. et al. (2014) DEAD-box helicase DP103 defines metastatic potential of human breast cancers. *J. Clin. Invest.* **124**, 3807–3824, <https://doi.org/10.1172/JCI73451>
- 233 Cai, W., Xiong Chen, Z., Rane, G., Satendra Singh, S., Choo, Z., Wang, C. et al. (2017) Wanted DEAD/H or alive: helicases winding up in cancers. *J. Natl. Cancer Inst.* **109**, djw278, <https://doi.org/10.1093/jnci/djw278>
- 234 Bourova-Flin, E., Derakhshan, S., Goudarzi, A., Wang, T., Vitte, A.-L., Chuffart, F. et al. (2021) The combined detection of Amphiregulin, Cyclin A1 and DDX20/Gemin3 expression predicts aggressive forms of oral squamous cell carcinoma. *Br. J. Cancer* **125**, 1122–1134, <https://doi.org/10.1038/s41416-021-01491-x>
- 235 Yang, L., Lin, C. and Liu, Z.-R. (2006) P68 RNA helicase mediates PDGF-induced epithelial mesenchymal transition by displacing Axin from  $\beta$ -Catenin. *Cell* **127**, 139–155, <https://www.sciencedirect.com/science/article/pii/S0092867406011585>, <https://doi.org/10.1016/j.cell.2006.08.036>
- 236 Carter, C.L., Lin, C., Liu, C.-Y., Yang, L. and Liu, Z.-R. (2010) Phosphorylated p68 RNA helicase activates snail1 transcription by promoting HDAC1 dissociation from the snail1 promoter. *Oncogene* **29**, 5427–5436, <https://doi.org/10.1038/onc.2010.276>
- 237 Yan, X., Chang, J., Sun, R., Meng, X., Wang, W., Zeng, L. et al. (2019) DHX9 inhibits epithelial-mesenchymal transition in human lung adenocarcinoma cells by regulating STAT3. *Am. J. Transl. Res.* **11**, 4881–4894
- 238 Gulliver, C., Hoffmann, R. and Baillie, G.S. (2020) The enigmatic helicase DHX9 and its association with the hallmarks of cancer. *Future Sci. OA* **7**, FSO650, <https://doi.org/10.2144/fsoa-2020-0140>
- 239 Wang, Y., Sun, Y., Shang, C., Chen, L., Chen, H., Wang, D. et al. (2021) Distinct Ring1b complexes defined by DEAD-box helicases and EMT transcription factors synergistically enhance E-cadherin silencing in breast cancer. *Cell Death Dis.* **12**, 202, <https://doi.org/10.1038/s41419-021-03491-4>
- 240 Hong, T., Watanabe, K., Ta, C.H., Villarreal-Ponce, A., Nie, Q. and Dai, X. (2015) An *Ovol2-Zeb1* mutual inhibitory circuit governs bidirectional and multi-step transition between epithelial and mesenchymal states. *PLoS Comput. Biol.* **11**, e1004569, <https://doi.org/10.1371/journal.pcbi.1004569>
- 241 Casas, E., Kim, J., Bendesky, A., Ohno-Machado, L., Wolfe, C.J. and Yang, J. (2011) Snail2 is an essential mediator of Twist1-induced epithelial mesenchymal transition and metastasis. *Cancer Res.* **71**, 245LP–254LP, <http://cancerres.aacrjournals.org/content/71/1/245.abstract>, <https://doi.org/10.1158/0008-5472.CAN-10-2330>
- 242 Yu, W., Zhang, Y., Ruest, L.B. and Svoboda, K. (2013) Analysis of Snail1 function and regulation by Twist1 in palatal fusion. *Front. Physiol.* **4**, 12, <https://www.frontiersin.org/article/10.3389/fphys.2013.00012>, <https://doi.org/10.3389/fphys.2013.00012>
- 243 Dave, N., Guaita-Esteruelas, S., Gutarra, S., Frias, À., Beltran, M., Peiró, S. et al. (2011) Functional cooperation between Snail1 and Twist in the regulation of *ZEB1* expression during epithelial to mesenchymal transition\*. *J. Biol. Chem.* **286**, 12024–12032, <https://doi.org/10.1074/jbc.M110.168625>
- 244 Sato, M., Larsen, J.E., Lee, W., Sun, H., Shames, D.S., Dalvi, M.P. et al. (2013) Human lung epithelial cells progressed to malignancy through specific oncogenic manipulations. *Mol. Cancer Res.* **11**, 638LP–650LP, <http://mcr.aacrjournals.org/content/11/6/638.abstract>, <https://doi.org/10.1158/1541-7786.MCR-12-0634-T>
- 245 Vaz, M., Hwang, S.Y., Kagiampakis, I., Phallen, J., Patil, A., O'Hagan, H.M. et al. (2017) Chronic cigarette smoke-induced epigenomic changes precede sensitization of bronchial epithelial cells to single-step transformation by KRAS Mutations. *Cancer Cell* **32**, 360.e6–376.e6, <https://www.sciencedirect.com/science/article/pii/S1535610817303495>, <https://doi.org/10.1016/j.ccell.2017.08.006>
- 246 Jonckheere, S., Adams, J., De Groot, D., Campbell, K., Bex, G. and Goossens, S. (2021) Epithelial-mesenchymal transition (EMT) as a therapeutic target. *Cells Tissues Organs* **5**, 1–26, <https://doi.org/10.1159/000512218>
- 247 Ramesh, V., Brabletz, T. and Ceppi, P. (2020) Targeting EMT in cancer with repurposed metabolic inhibitors. *Trends Cancer* **6**, 942–950, <https://www.sciencedirect.com/science/article/pii/S2405803320301898>, <https://doi.org/10.1016/j.trecan.2020.06.005>
- 248 Feng, Y.-L., Chen, D.-Q., Vaziri, N.D., Guo, Y. and Zhao, Y.-Y. (2020) Small molecule inhibitors of epithelial-mesenchymal transition for the treatment of cancer and fibrosis. *Med. Res. Rev.* **40**, 54–78, <https://doi.org/10.1002/med.21596>
